# Supplementary material for: An easy access to unsymmetrical ureas: a photocatalytic approach to the Lossen rearrangement
Source: Royal Society of Chemistry journal article supplement (doi:10.1039/c4ra03805c), 2014-01-01

Electronic Supplementary Material (ESI) for *RSC Advances*  
This journal is (c) The Royal Society of Chemistry 2014

**Supplementary Information for**

**An easy access to unsymmetrical ureas: a photocatalytic approach  
to the Lossen rearrangement**

**Arvind K. Yadav, Vishnu P. Srivastava and Lal Dhar S. Yadav\***

*Green Synthesis Lab, Department of Chemistry, University of Allahabad,*

*Allahabad-211002, India*

*E-mail: ldsyadav@hotmail.com*

Copies of  $^1\text{H}$  and  $^{13}\text{C}$  NMR spectra (page 2-31).

Compound 3a.  $^1\text{H}$  NMR Spectrum ( $\text{CDCl}_3$ ).

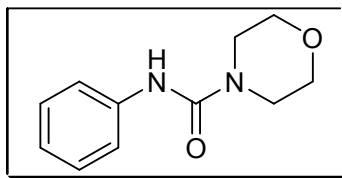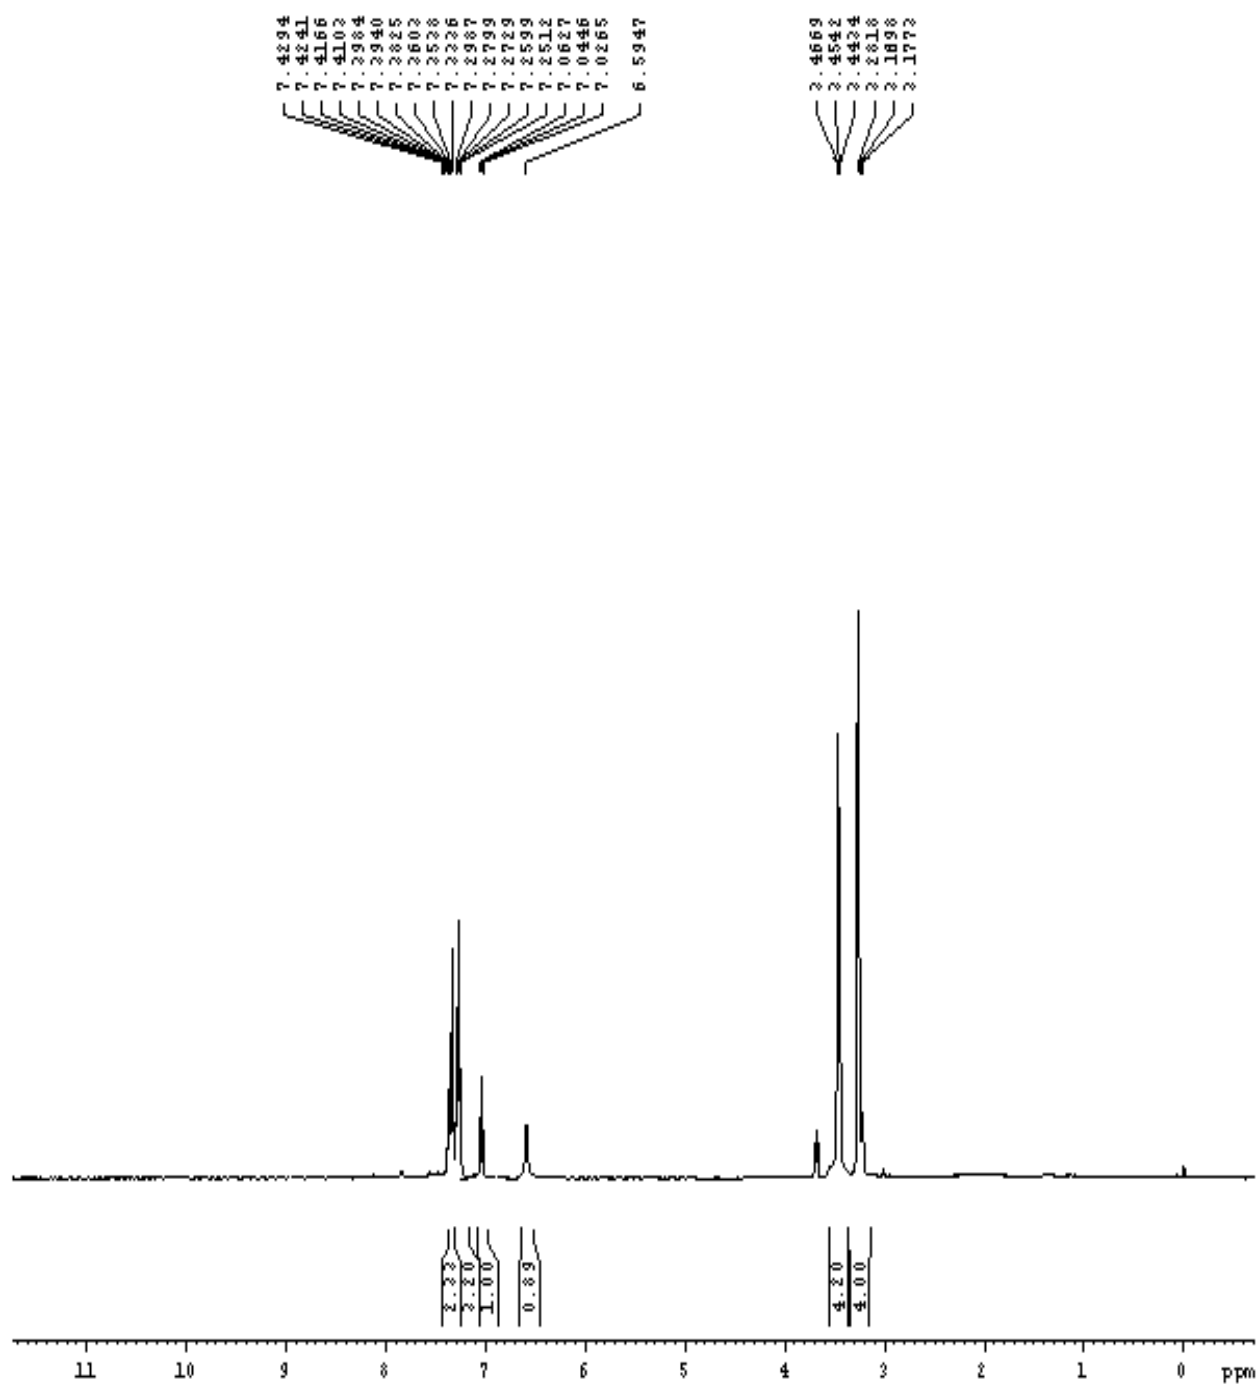

Compound 3a.  $^{13}\text{C}$  NMR Spectrum ( $\text{CDCl}_3$ ).

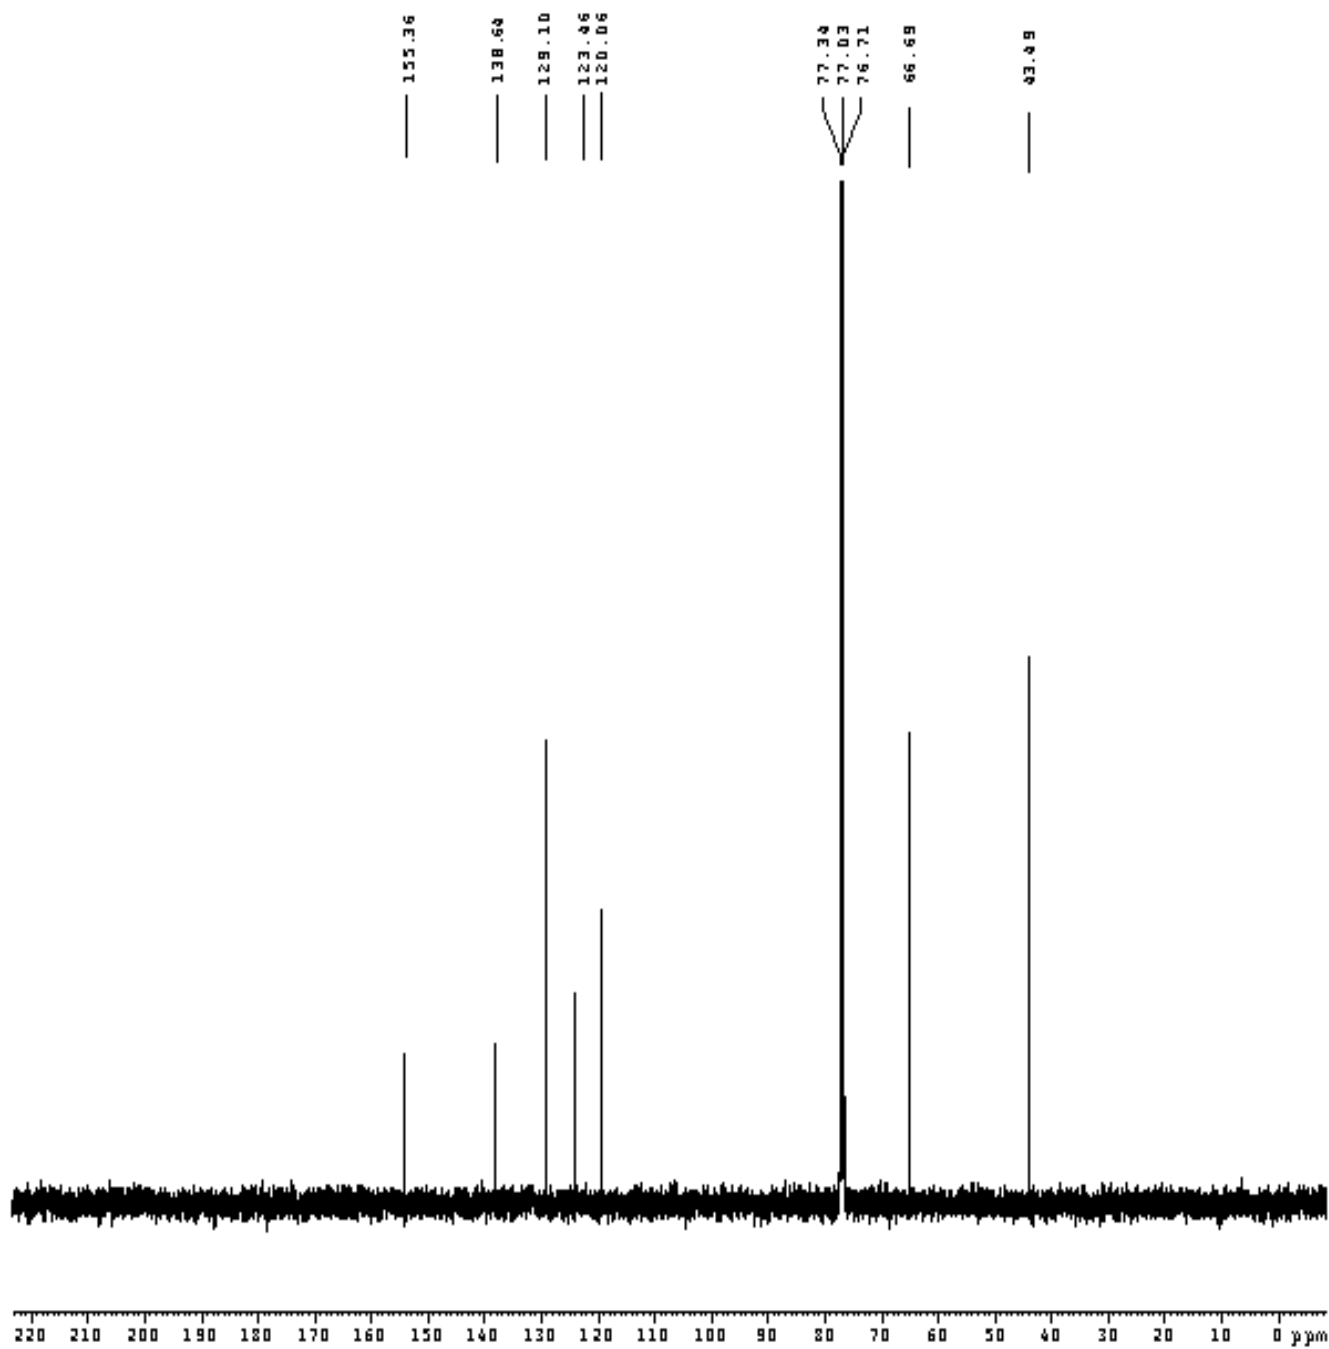

Compound 3b. <sup>1</sup>H NMR Spectrum (DMSO-d<sub>6</sub>).

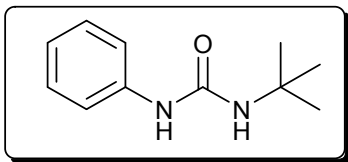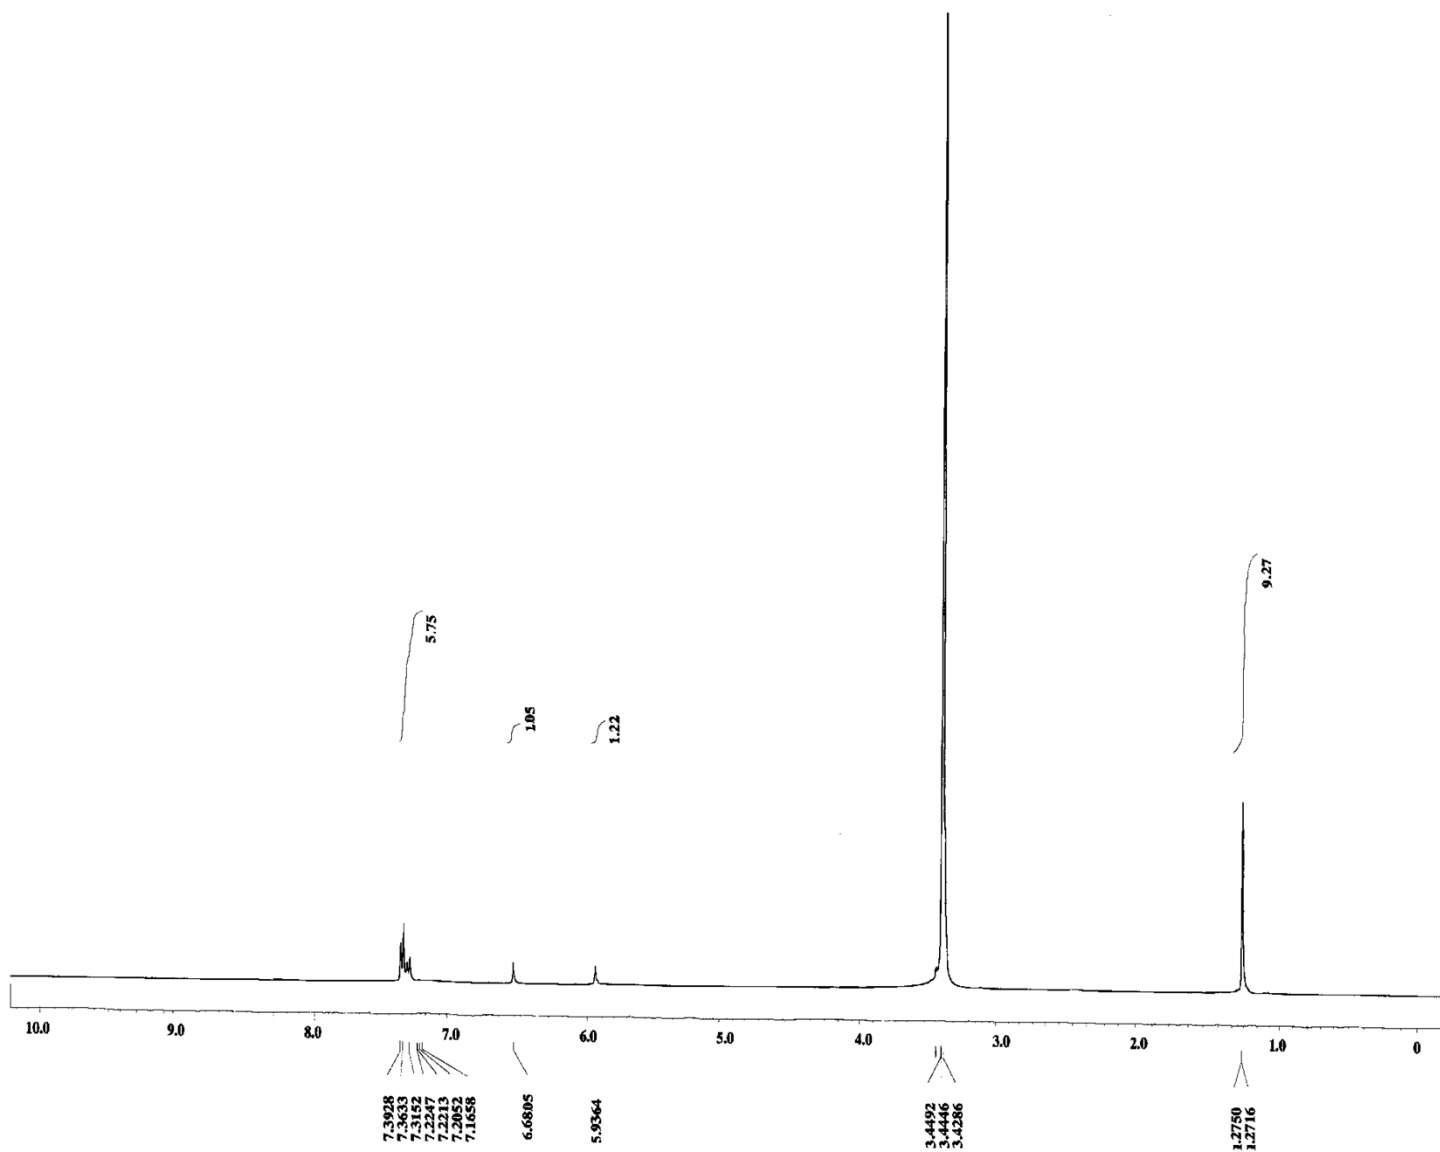

Compound 3b.  $^1\text{H}$  NMR Spectrum (DMSO- $d_6$ ).

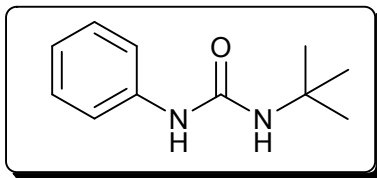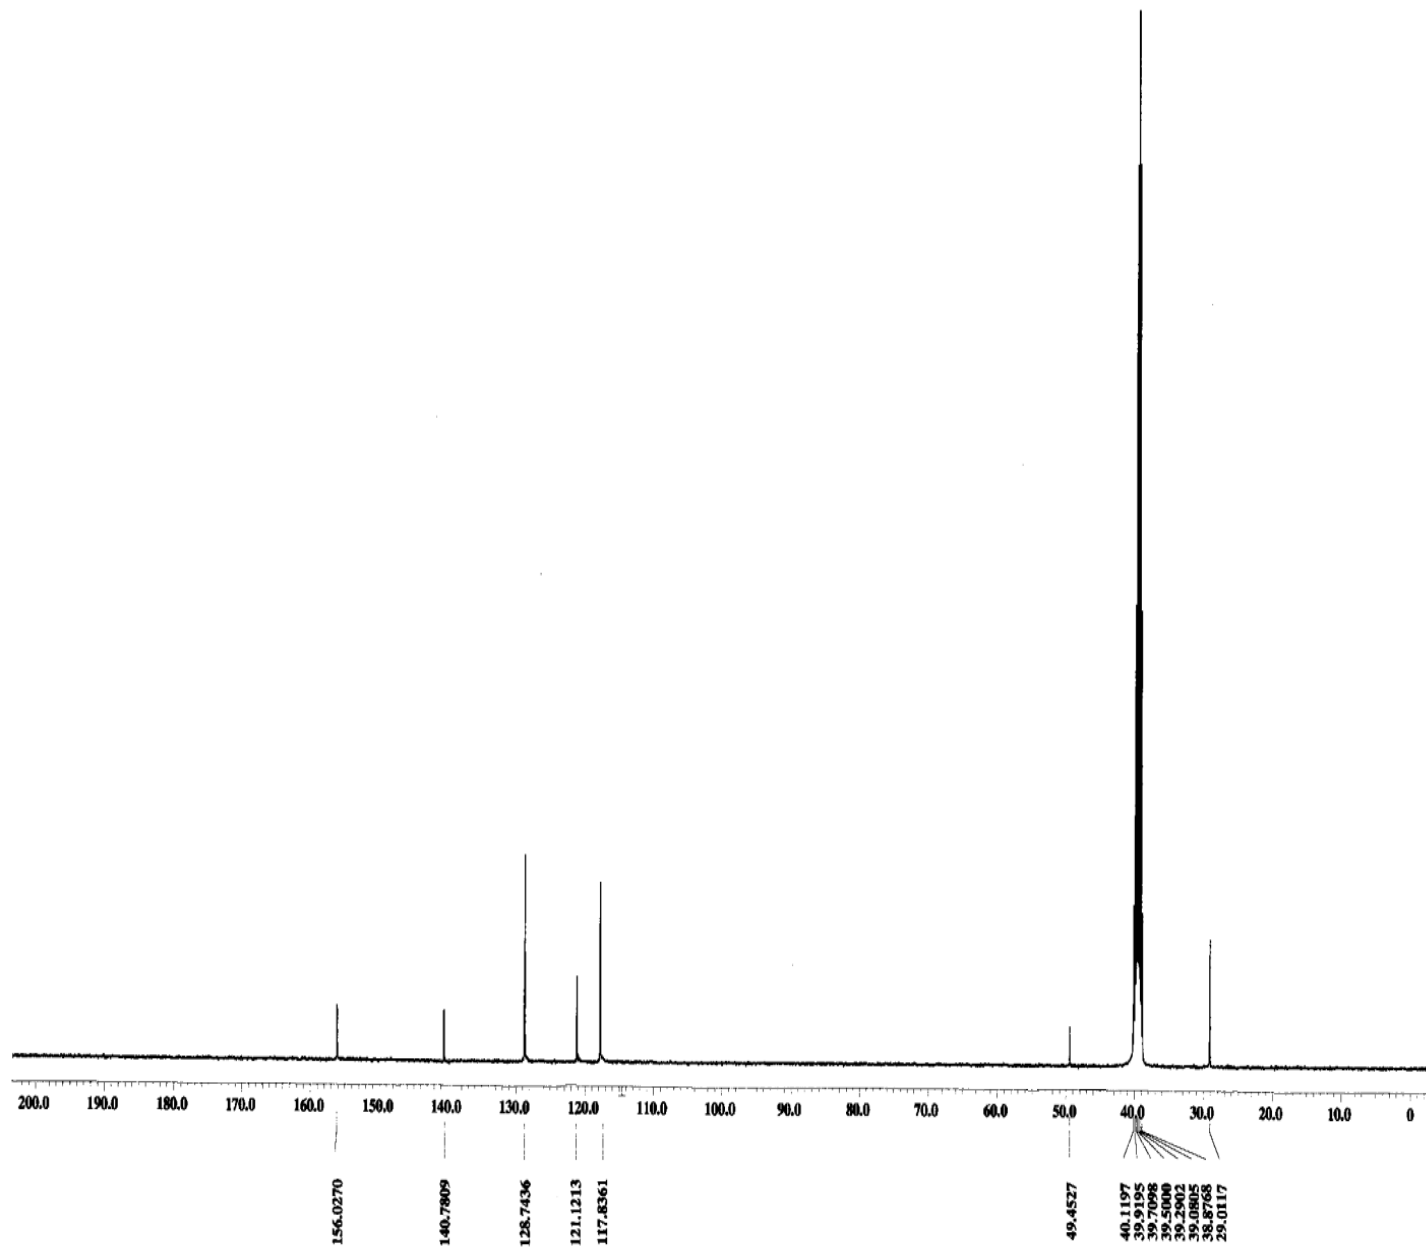

Compound 3c. <sup>1</sup>H NMR Spectrum (CDCl<sub>3</sub>).

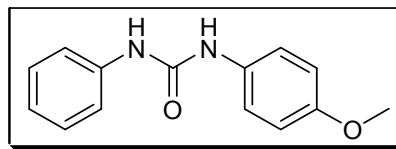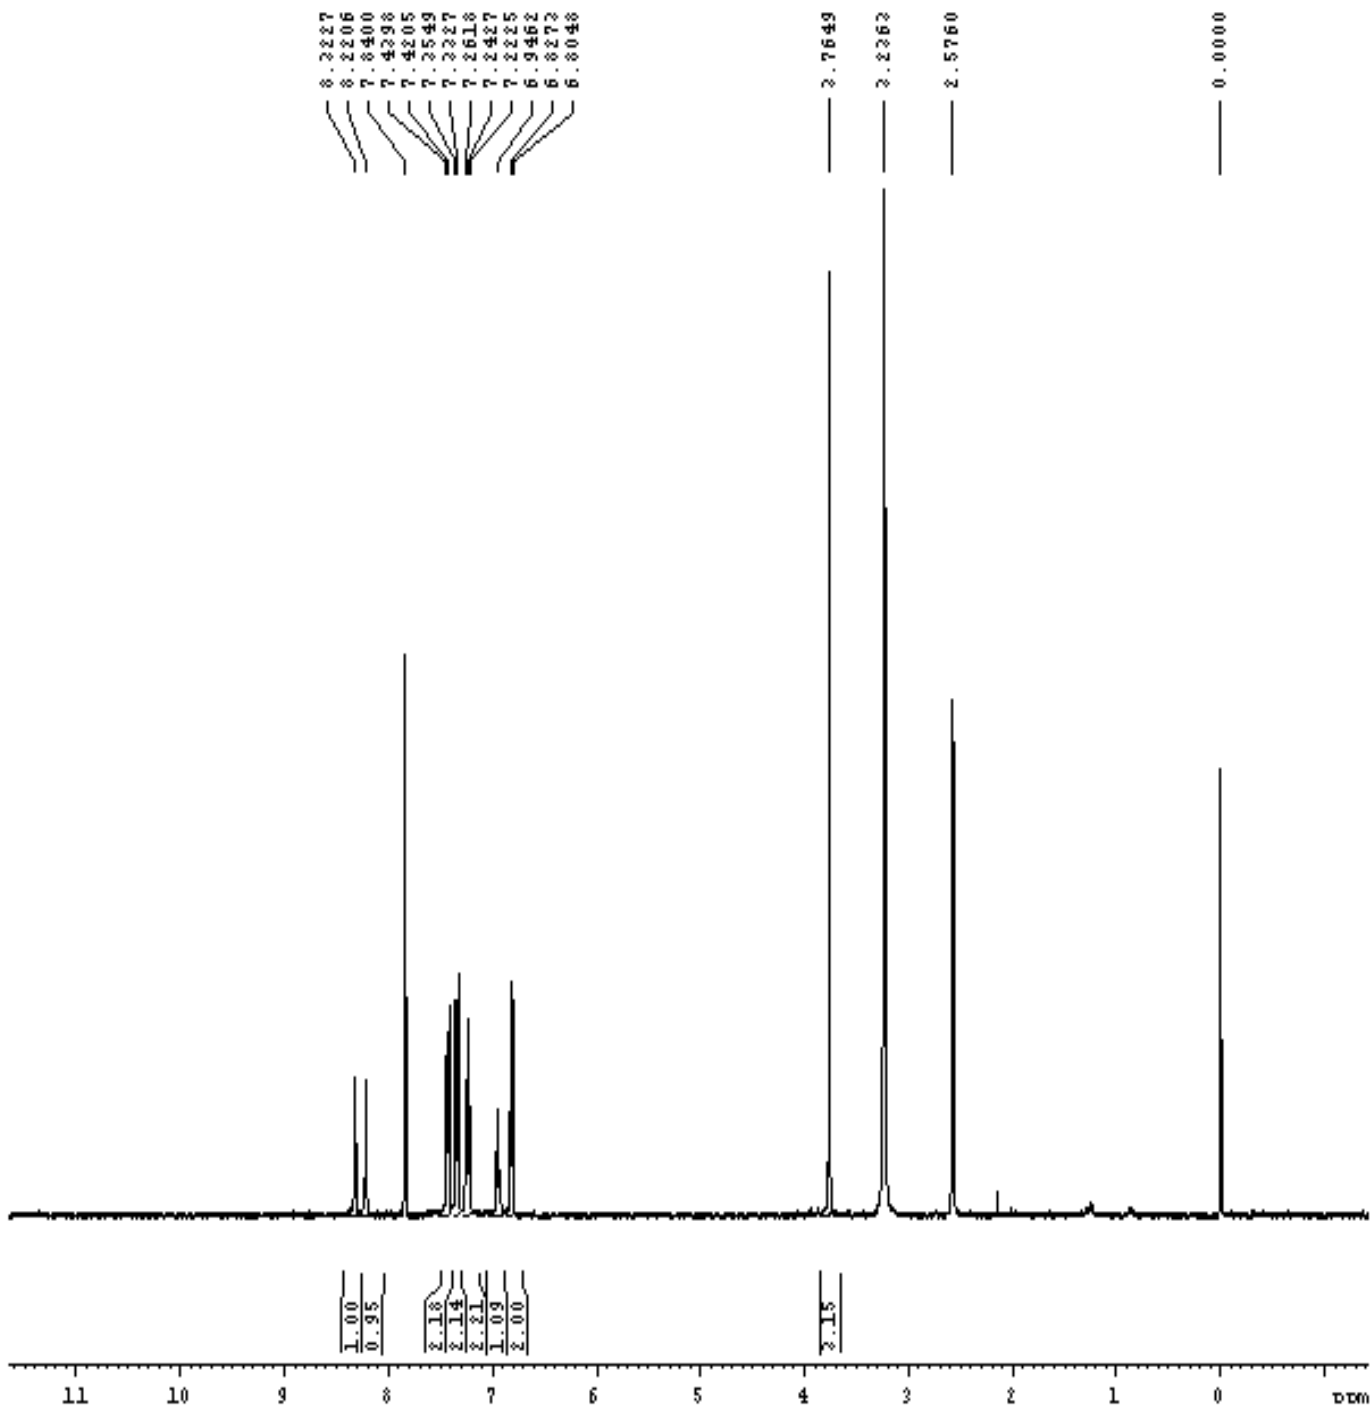

Compound 3c.  $^{13}\text{C}$  NMR Spectrum ( $\text{CDCl}_3$ ).

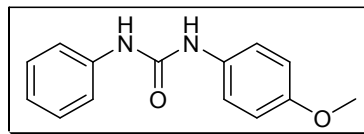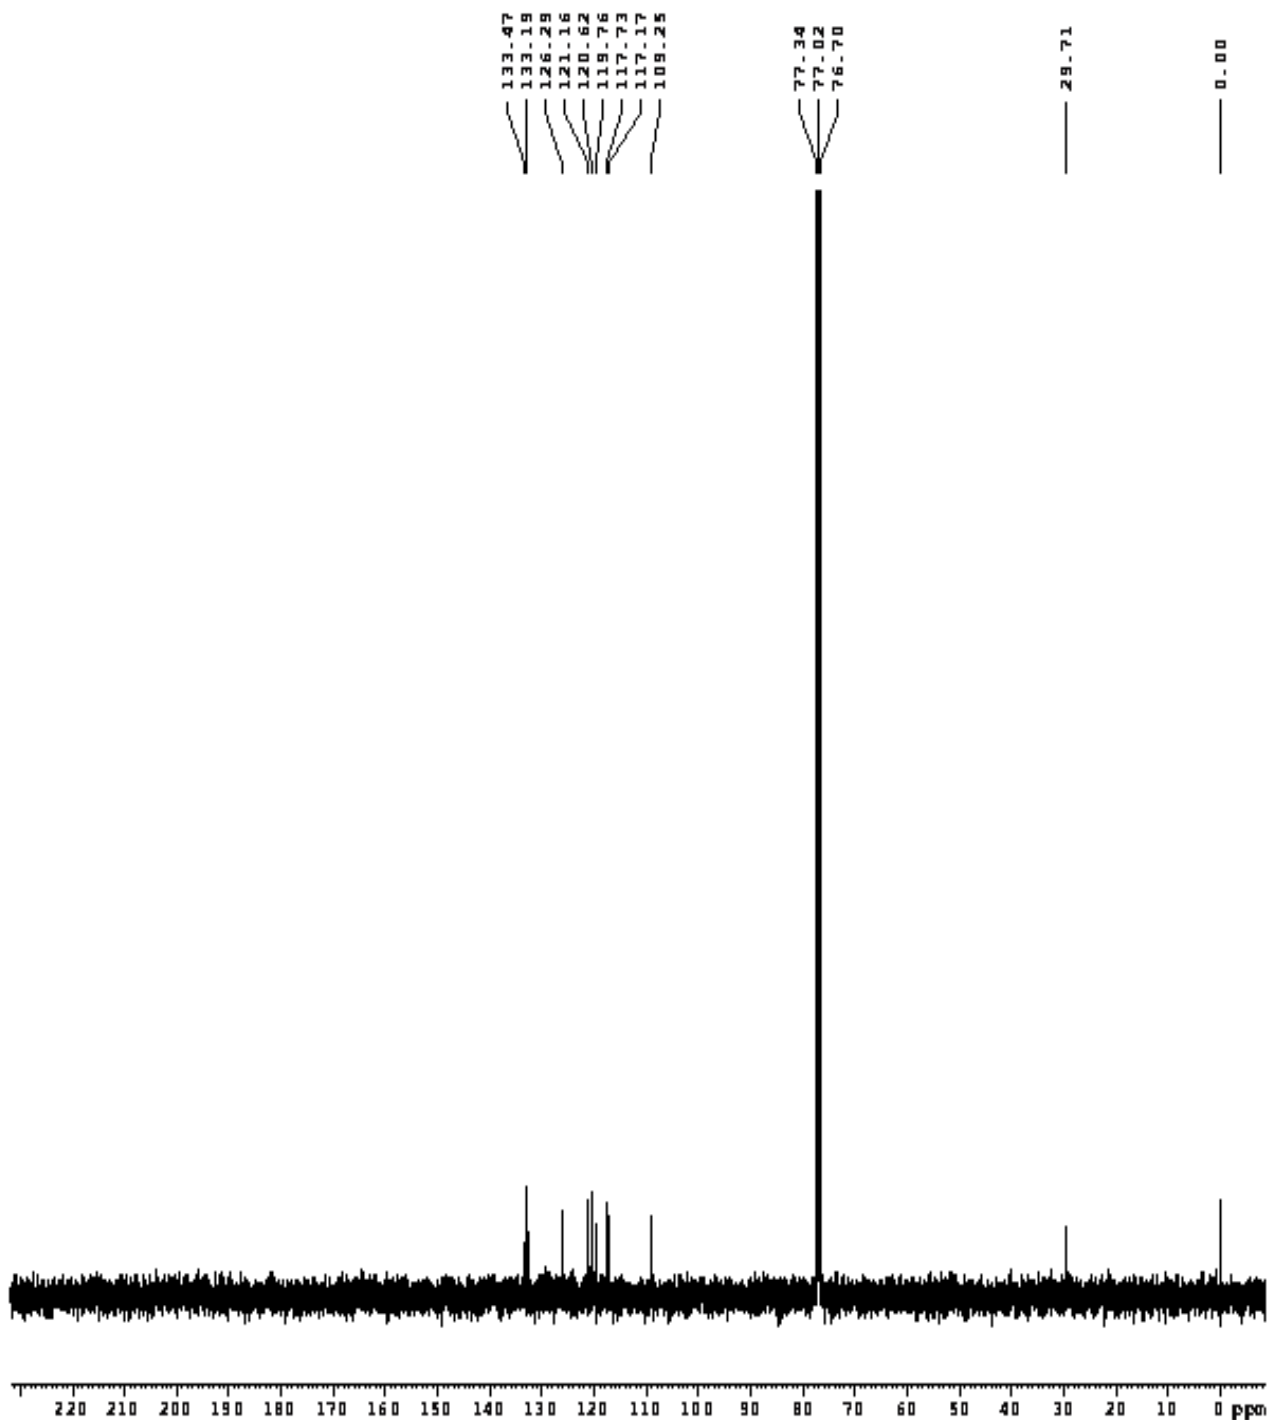

Compound 3d.  $^1\text{H}$  NMR Spectrum (DMSO- $d_6$ ).

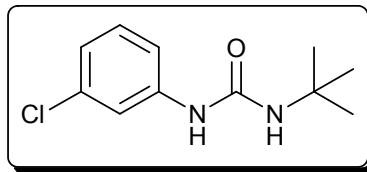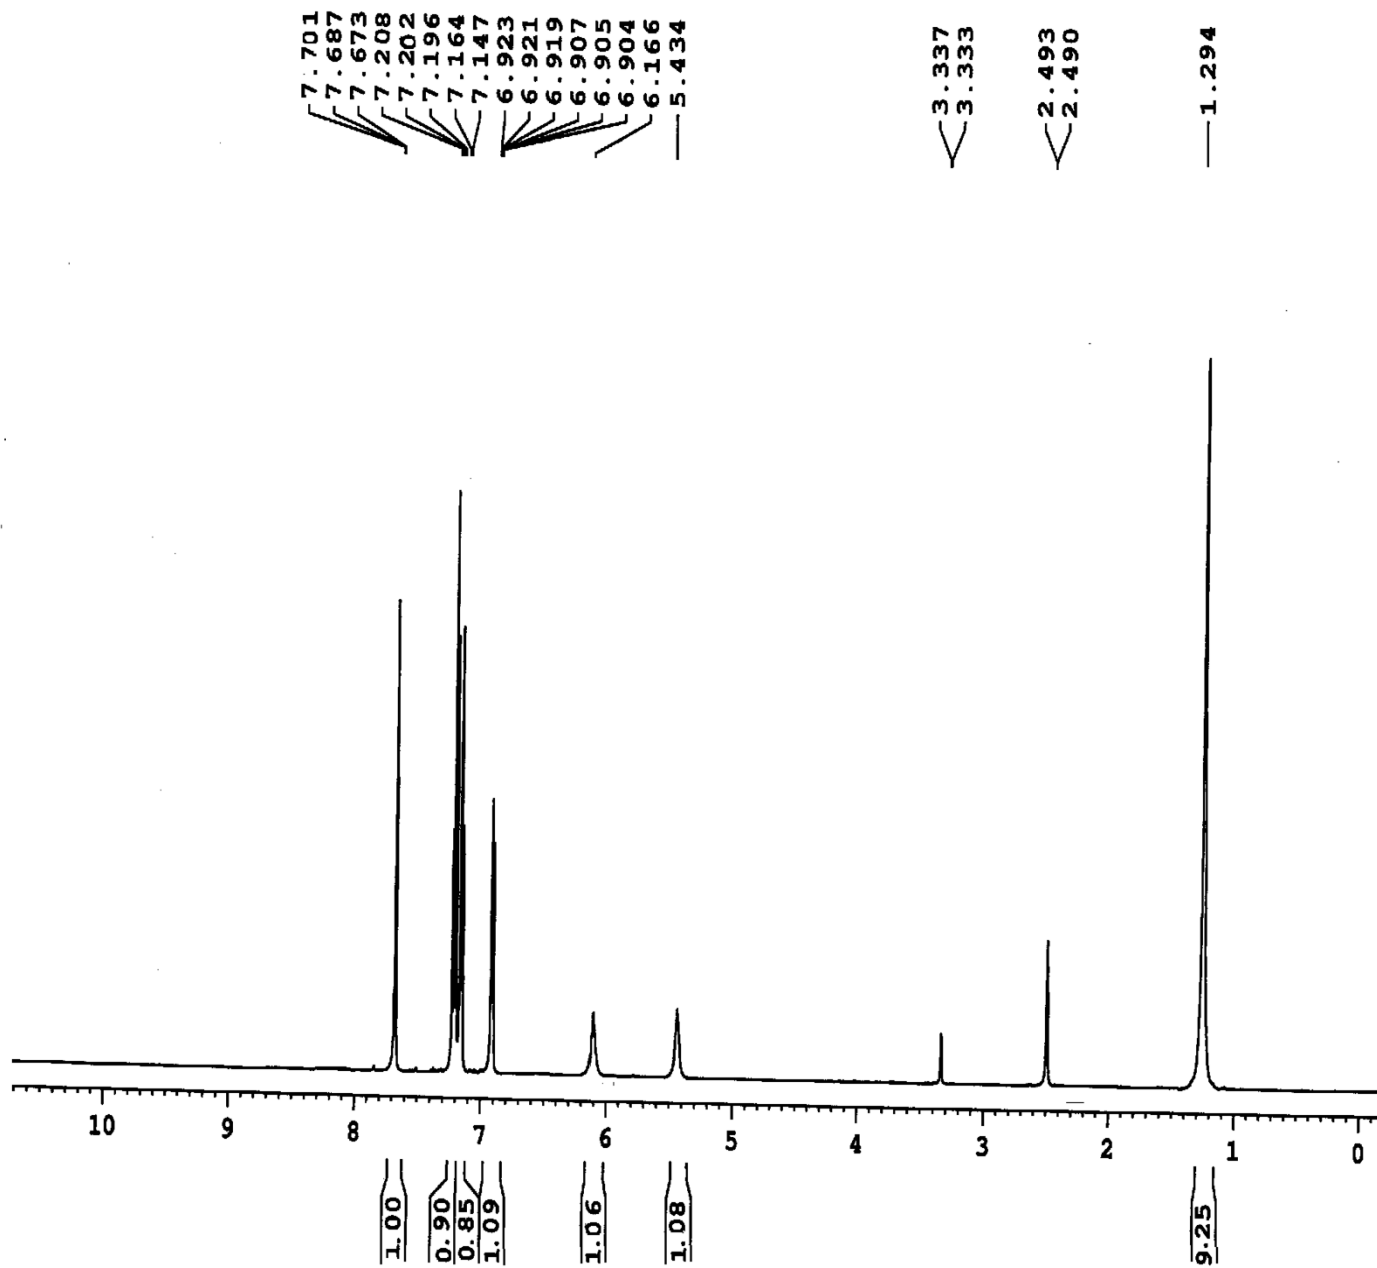



Compound 3d.  $^{13}\text{C}$  NMR Spectrum (DMSO- $d_6$ ).

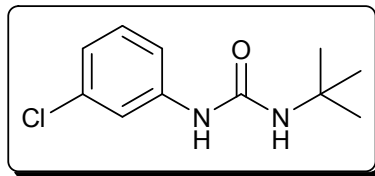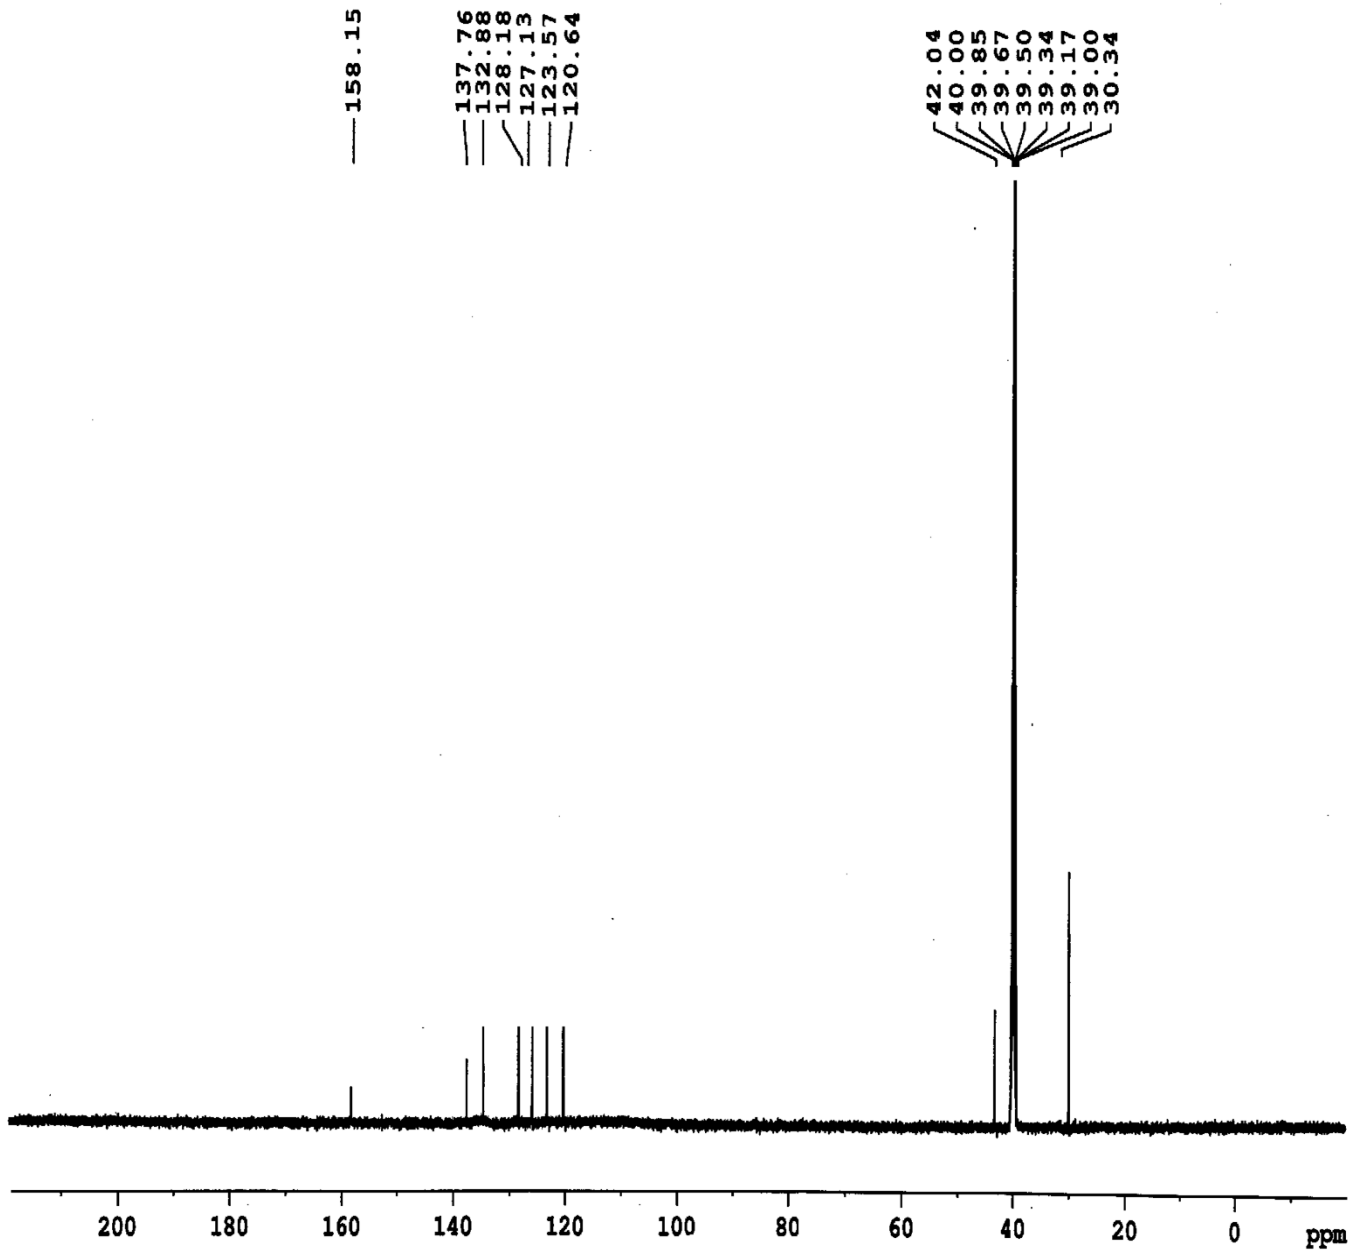

Compound 3e.  $^1\text{H}$  NMR Spectrum (DMSO- $d_6$ ).

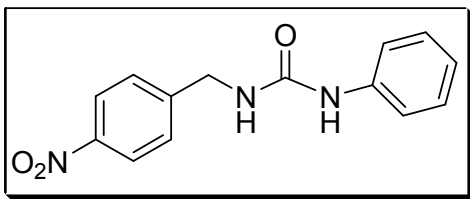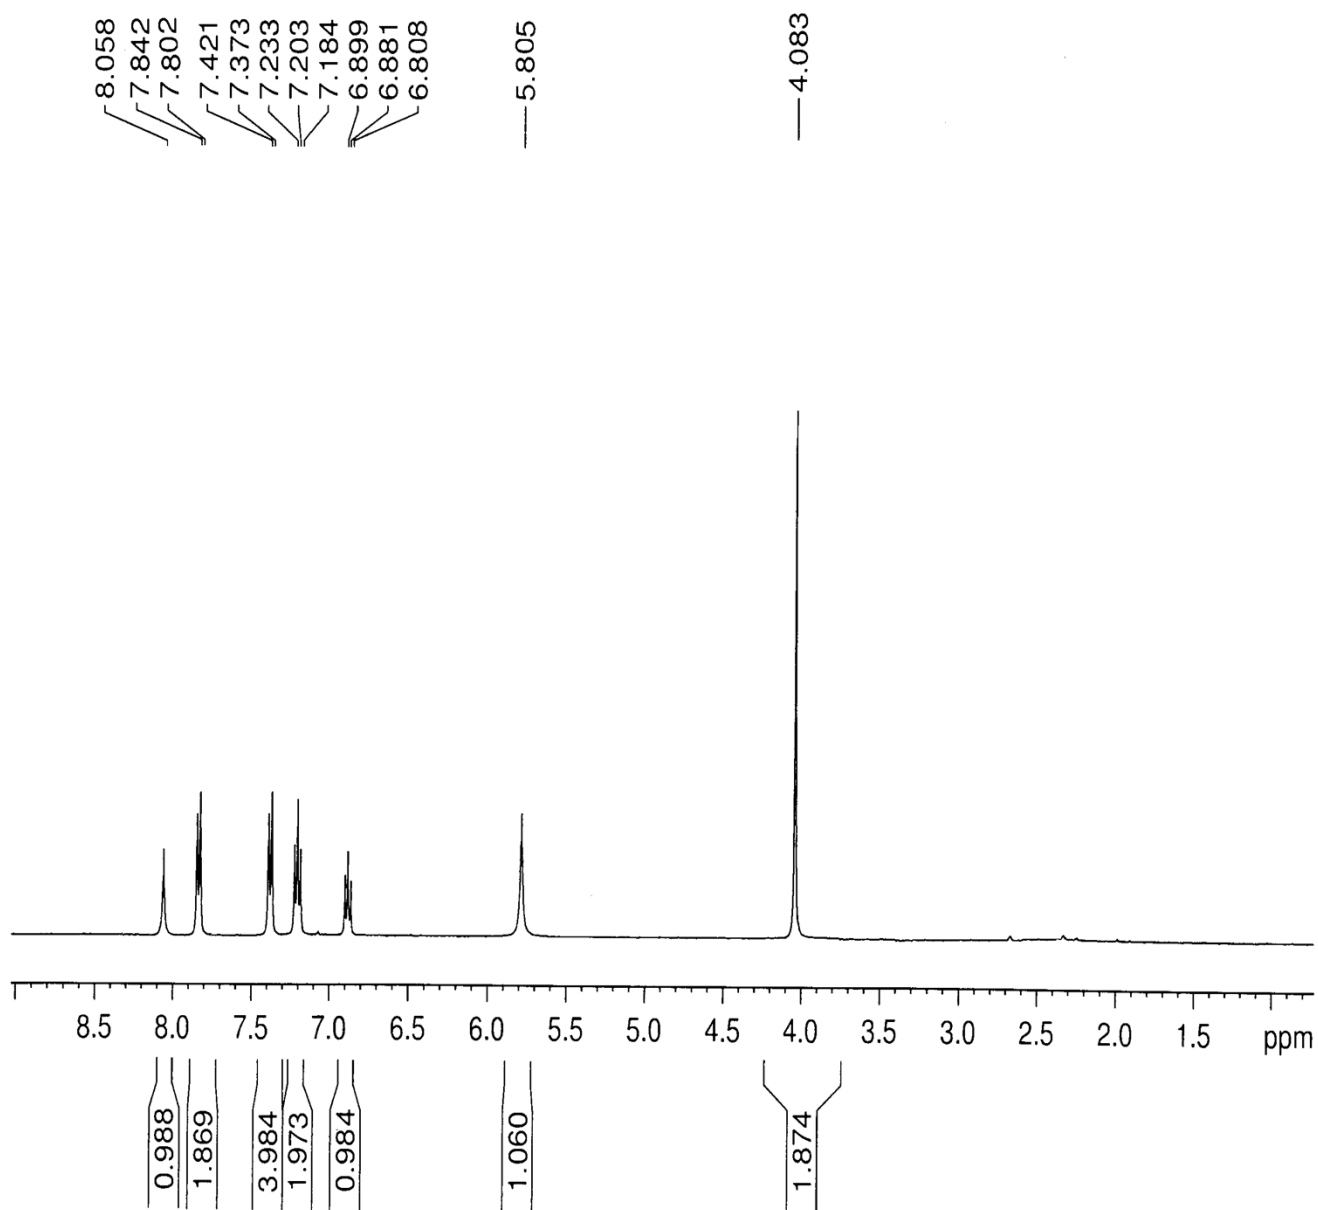

Compound 3e.  $^1\text{H}$  NMR Spectrum ( $\text{DMSO-}d_6$ ).

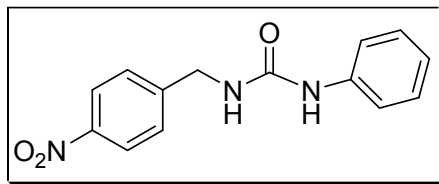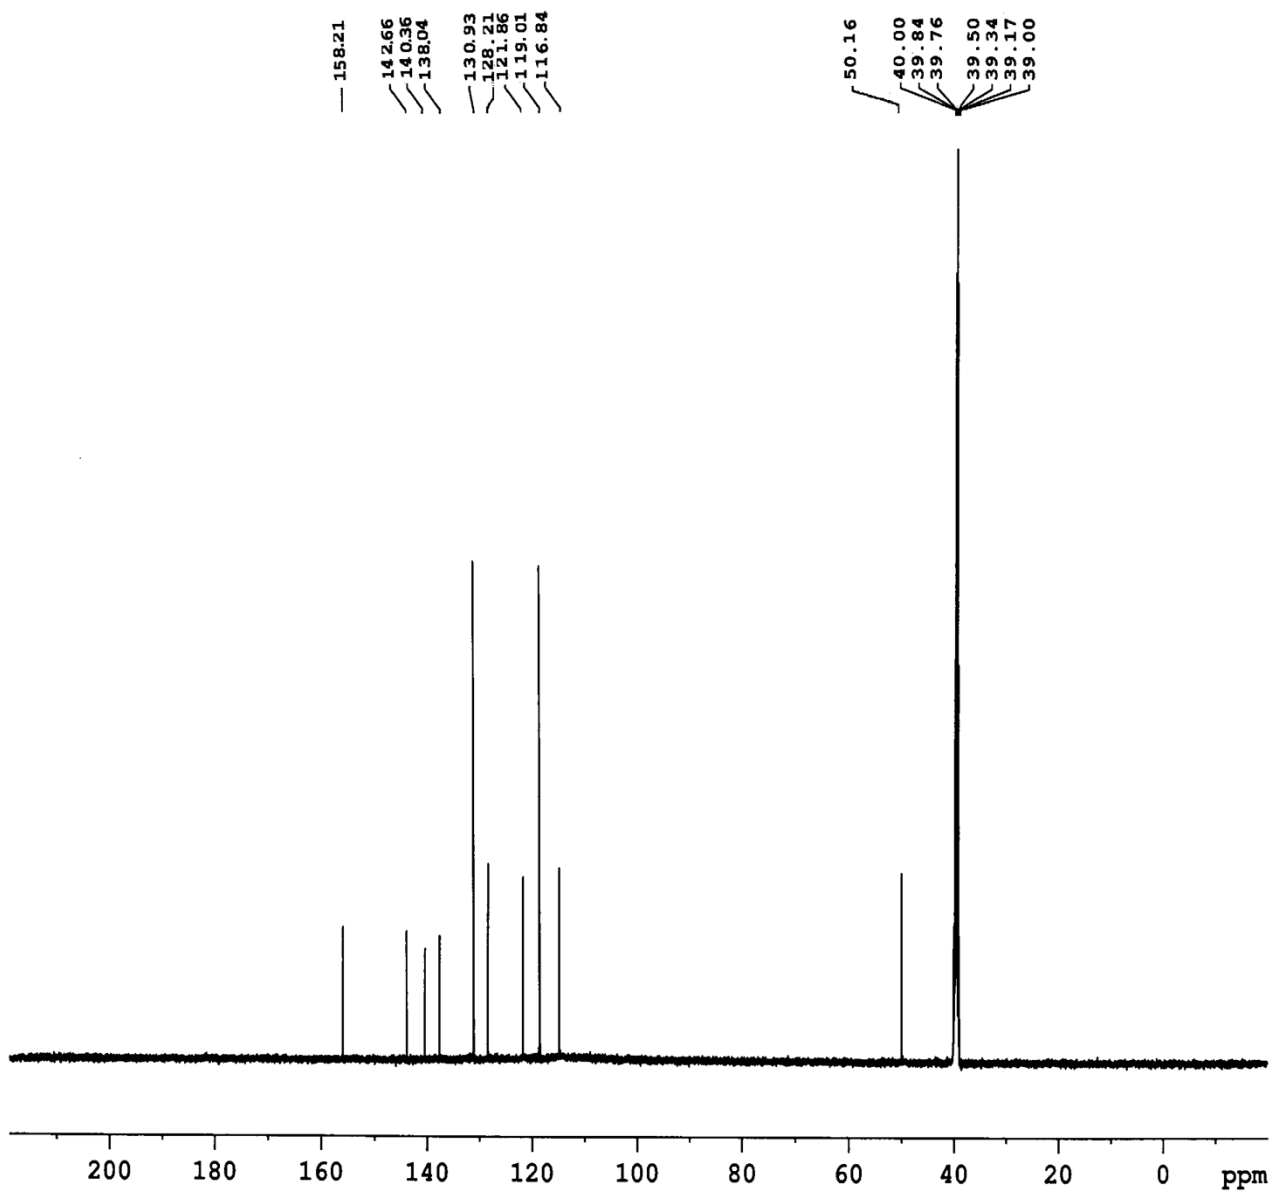

Compound 3f.  $^1\text{H}$  NMR Spectrum (DMSO- $d_6$ ).

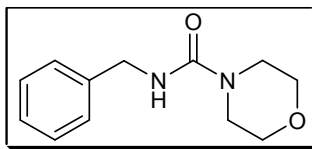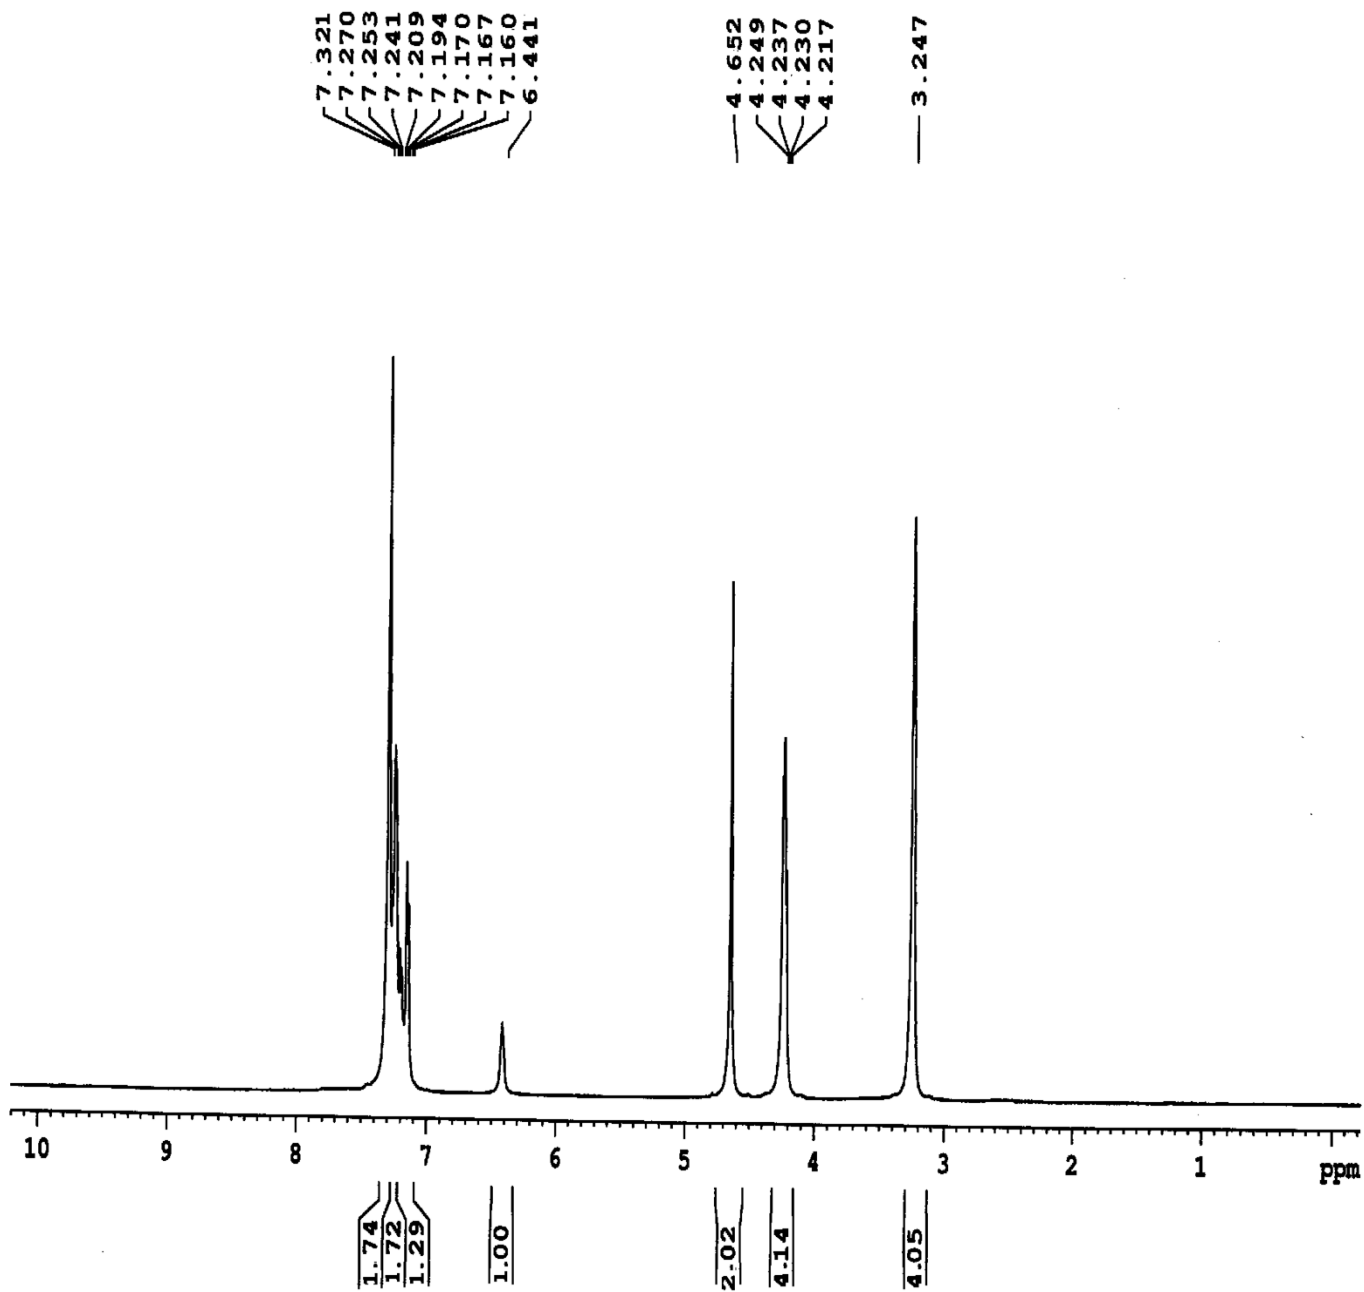

Compound 3f.  $^{13}\text{C}$  NMR Spectrum (DMSO- $d_6$ ).

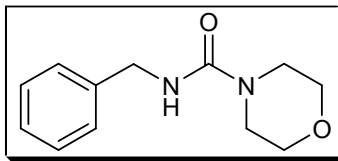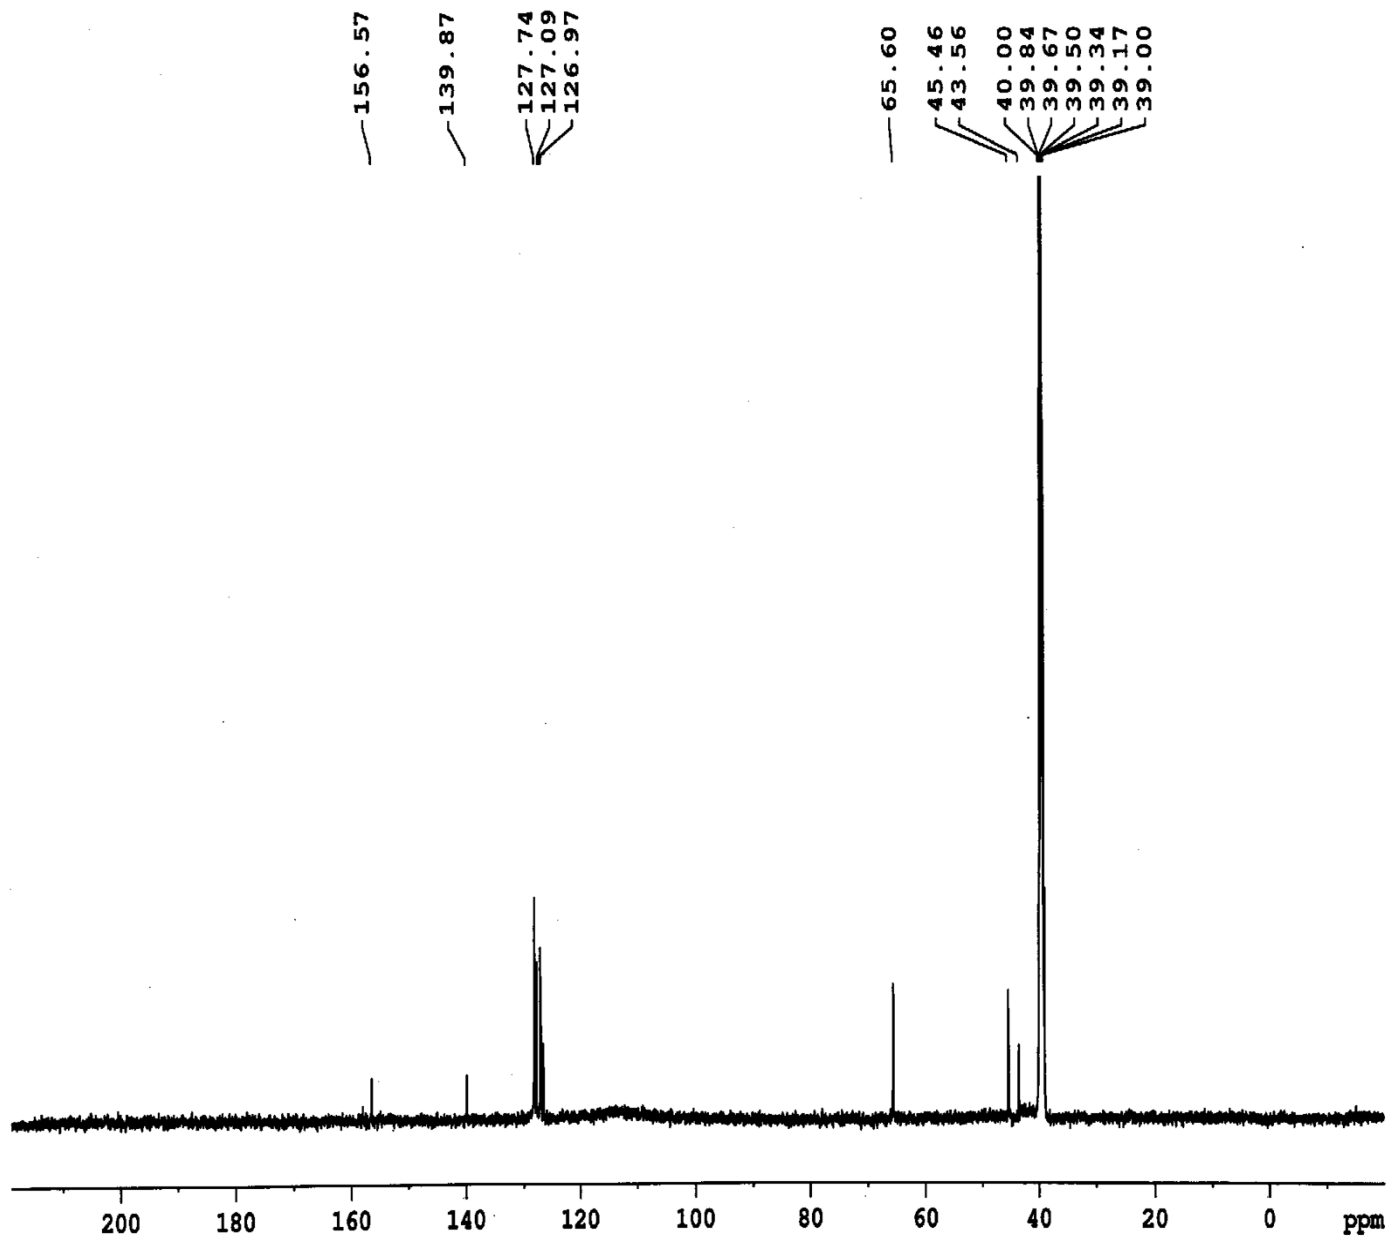

Compound 3g.  $^1\text{H}$  NMR Spectrum (DMSO- $d_6$ ).

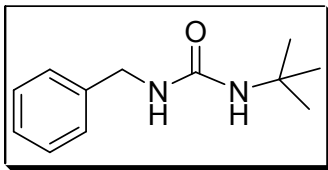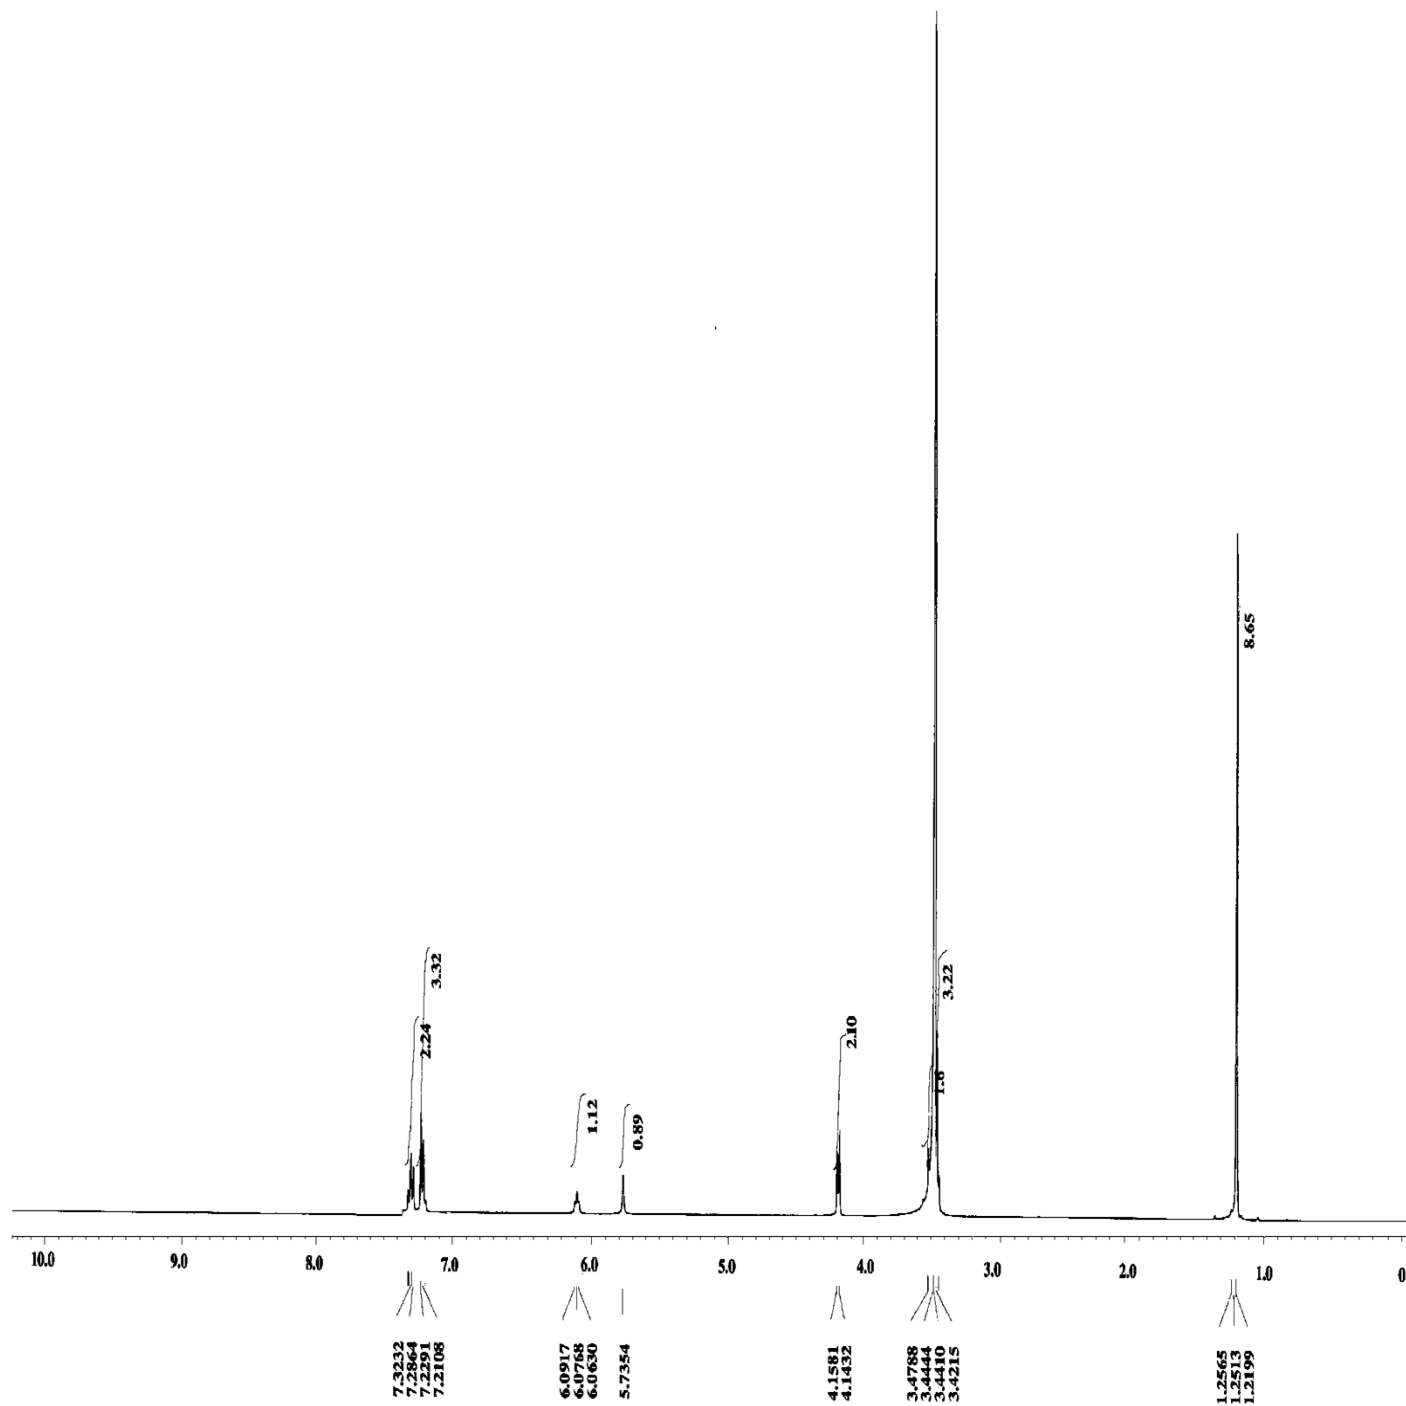

Compound 3g.  $^{13}\text{C}$  NMR Spectrum (DMSO- $d_6$ ).

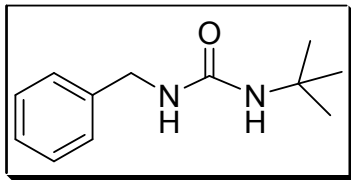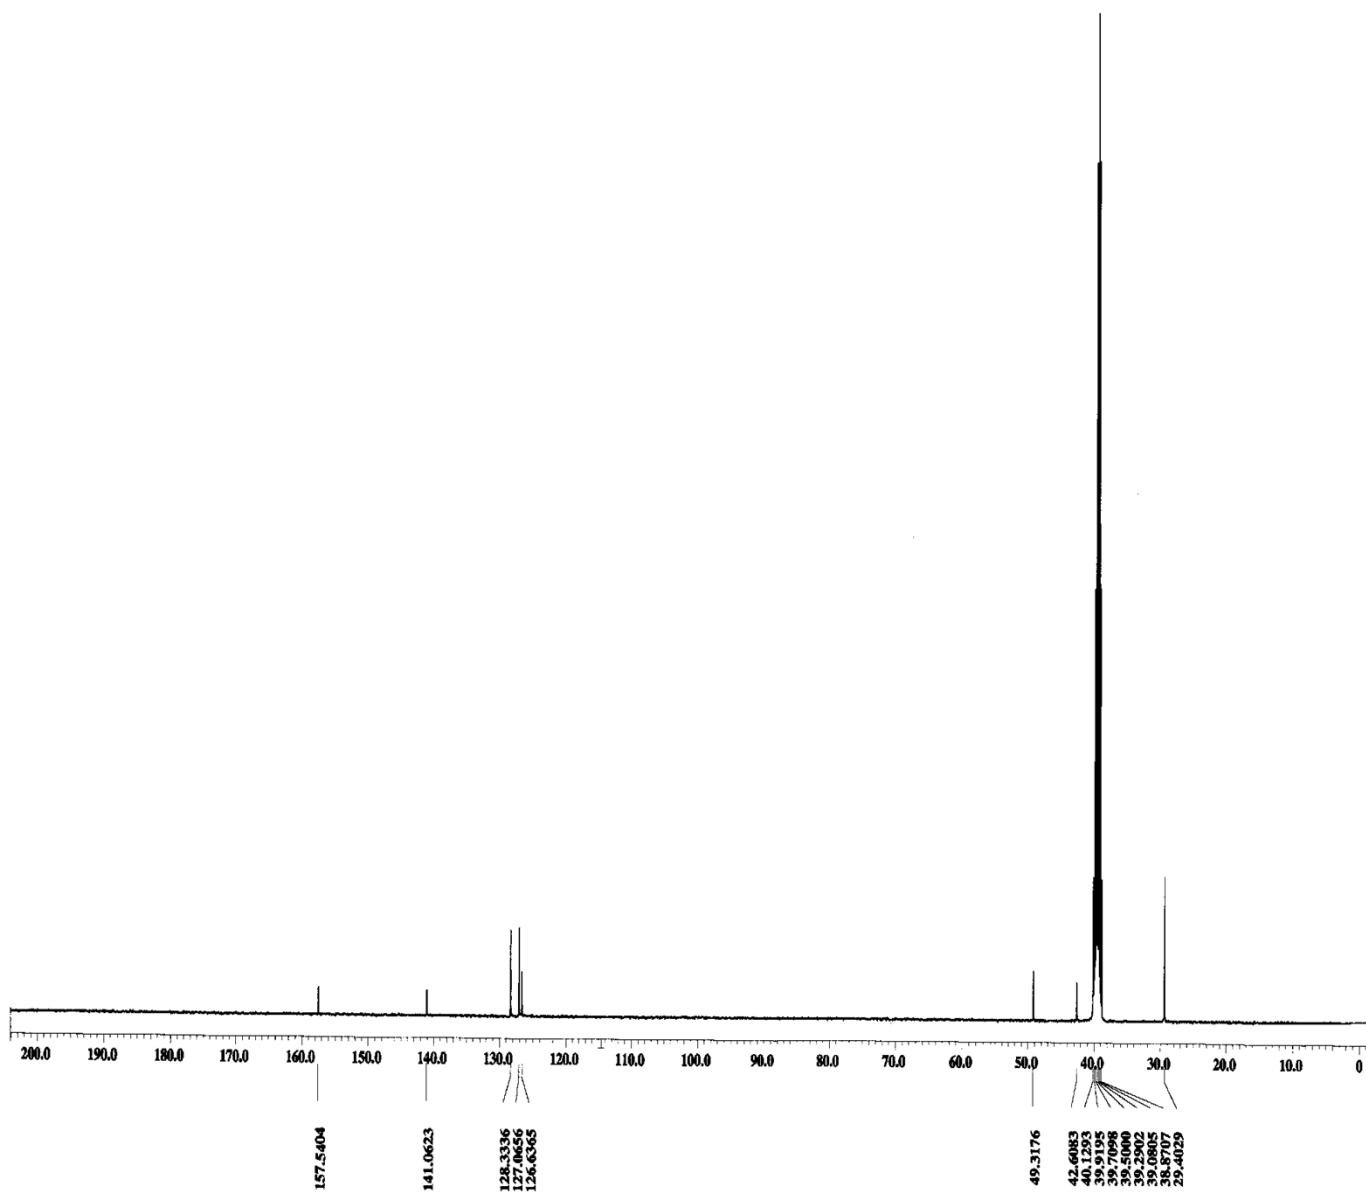

Compound 3h.  $^1\text{H}$  NMR Spectrum ( $\text{CDCl}_3$ ).

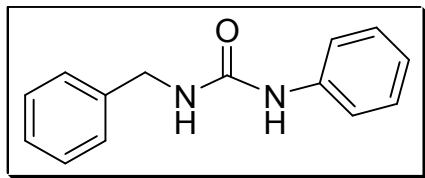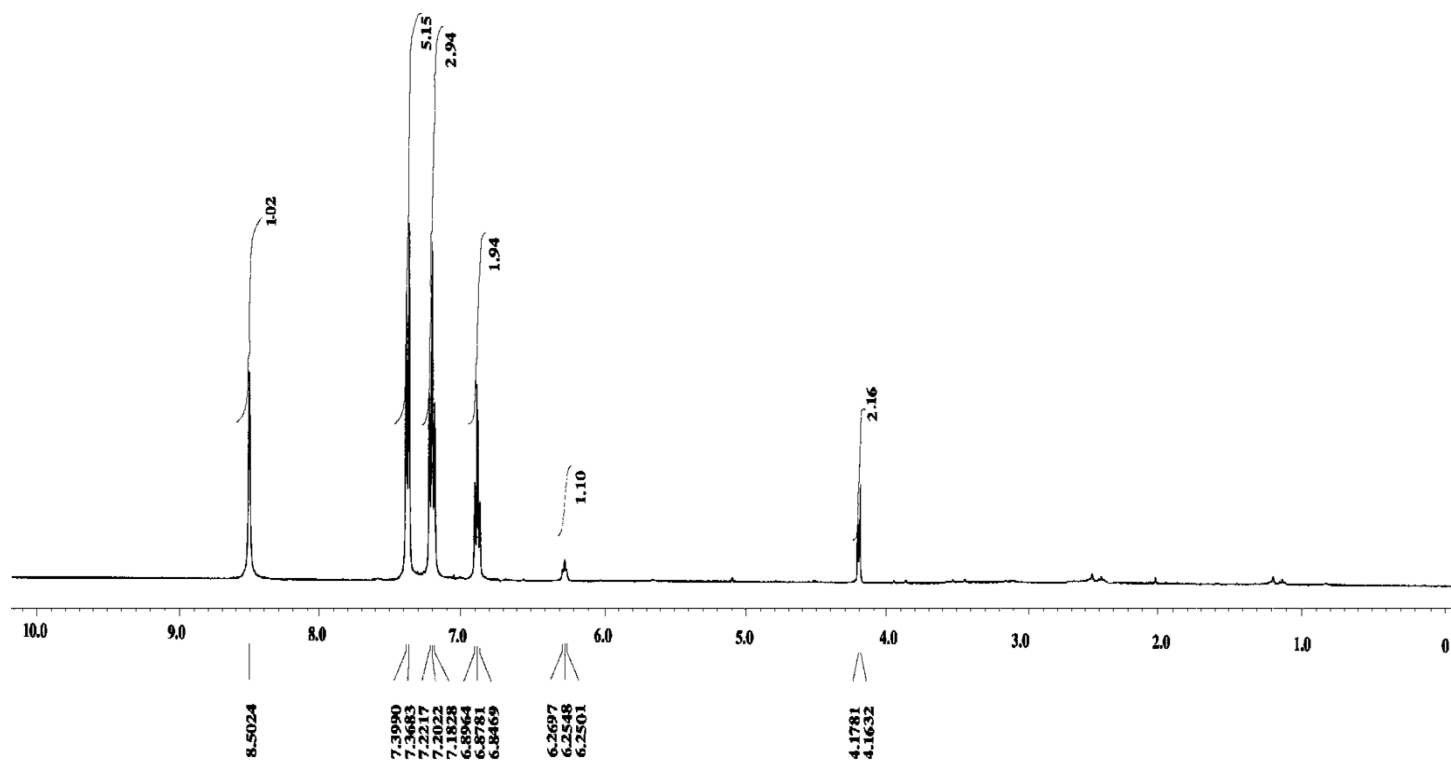



Compound 3h.  $^{13}\text{C}$  NMR Spectrum (DMSO- $d_6$ ).

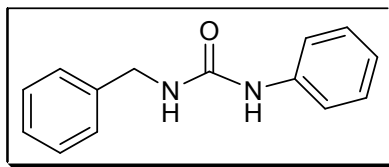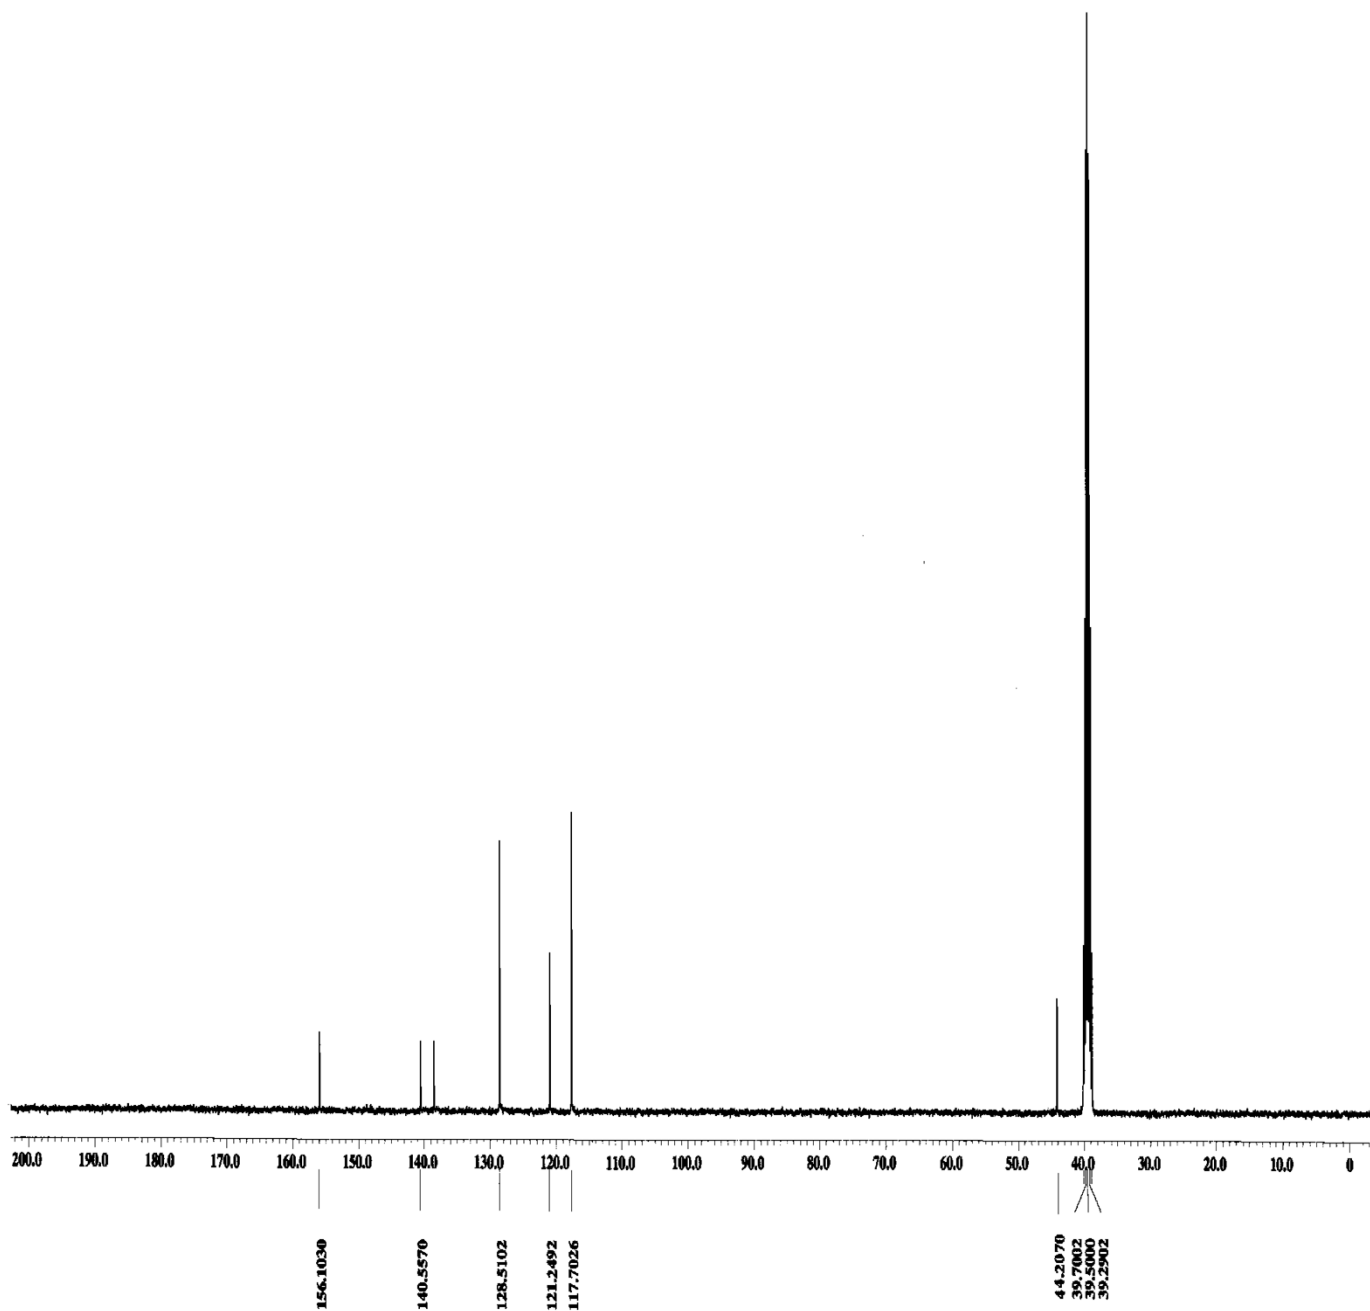

Compound 3i.  $^1\text{H}$  NMR Spectrum (DMSO- $d_6$ ).

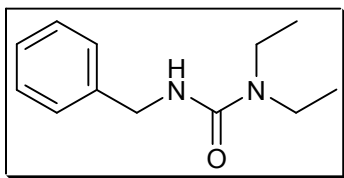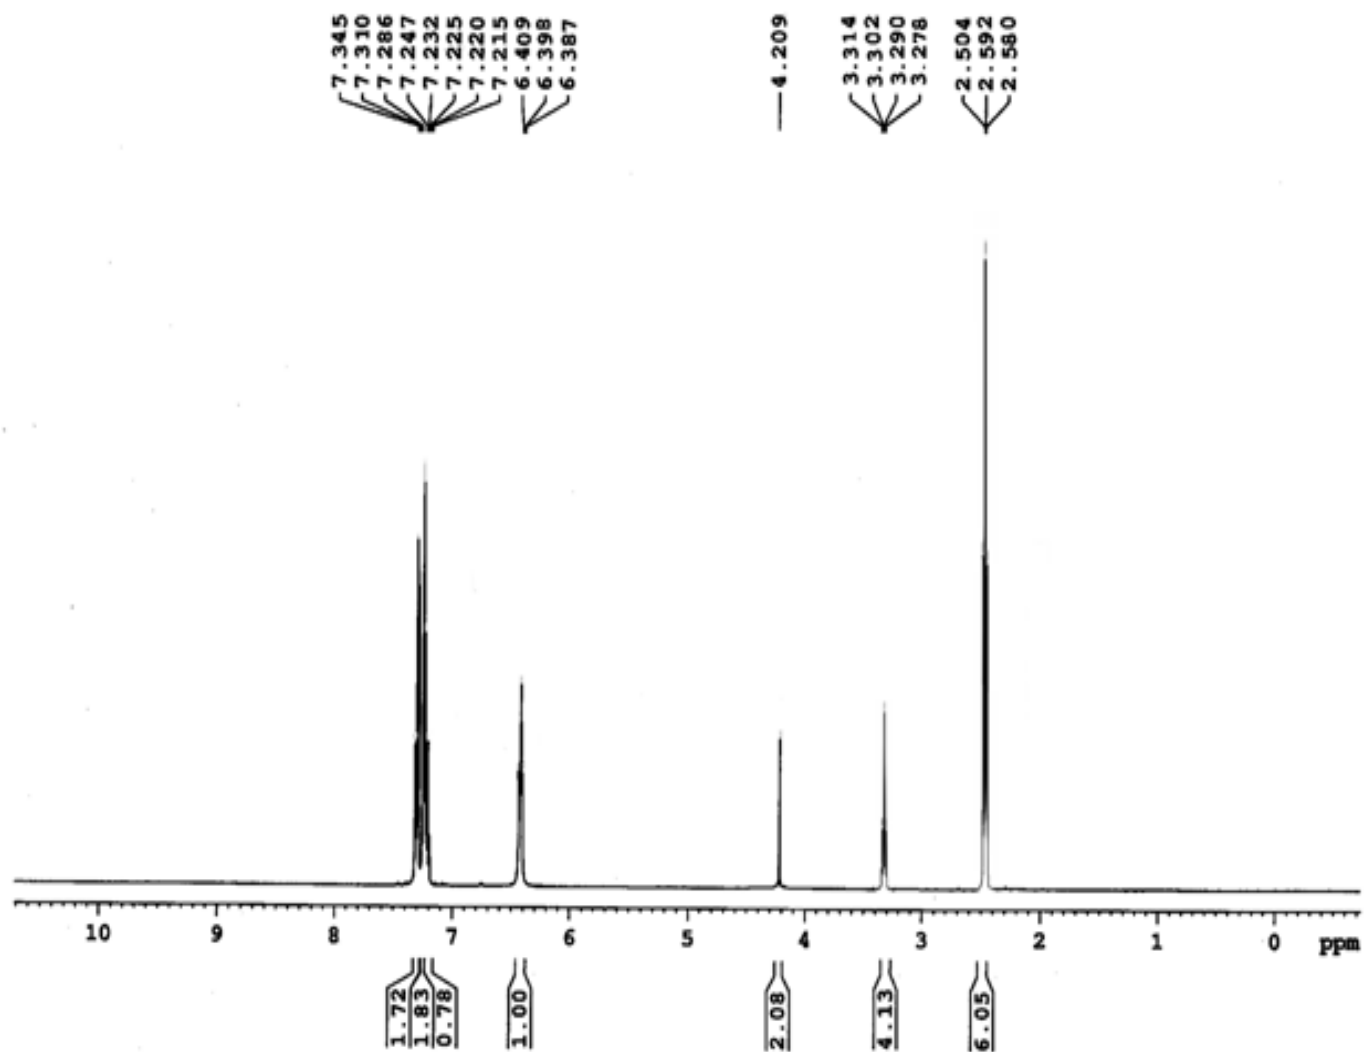

Compound 3i.  $^{13}\text{C}$  NMR Spectrum (DMSO- $d_6$ ).

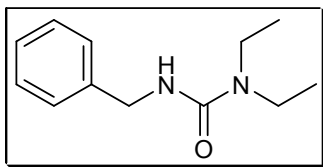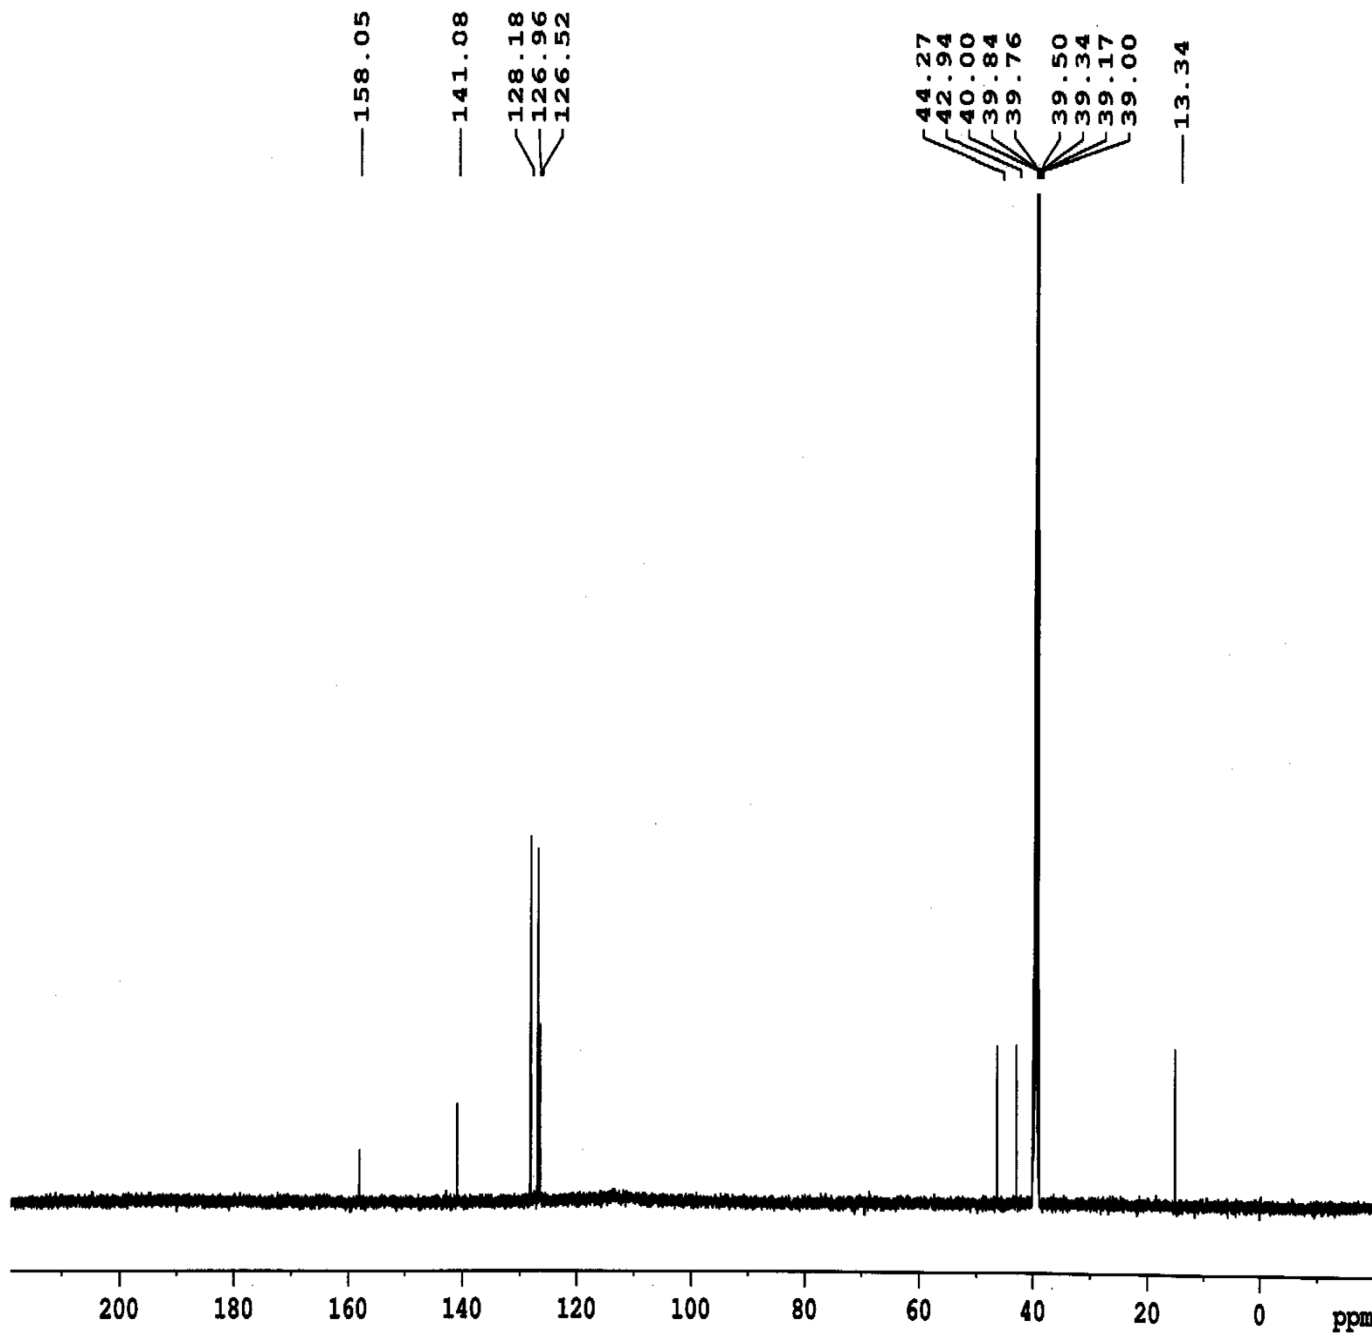

**Compound 3j.**  $^1\text{H}$  NMR Spectrum (DMSO- $d_6$ ).

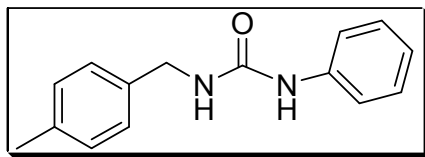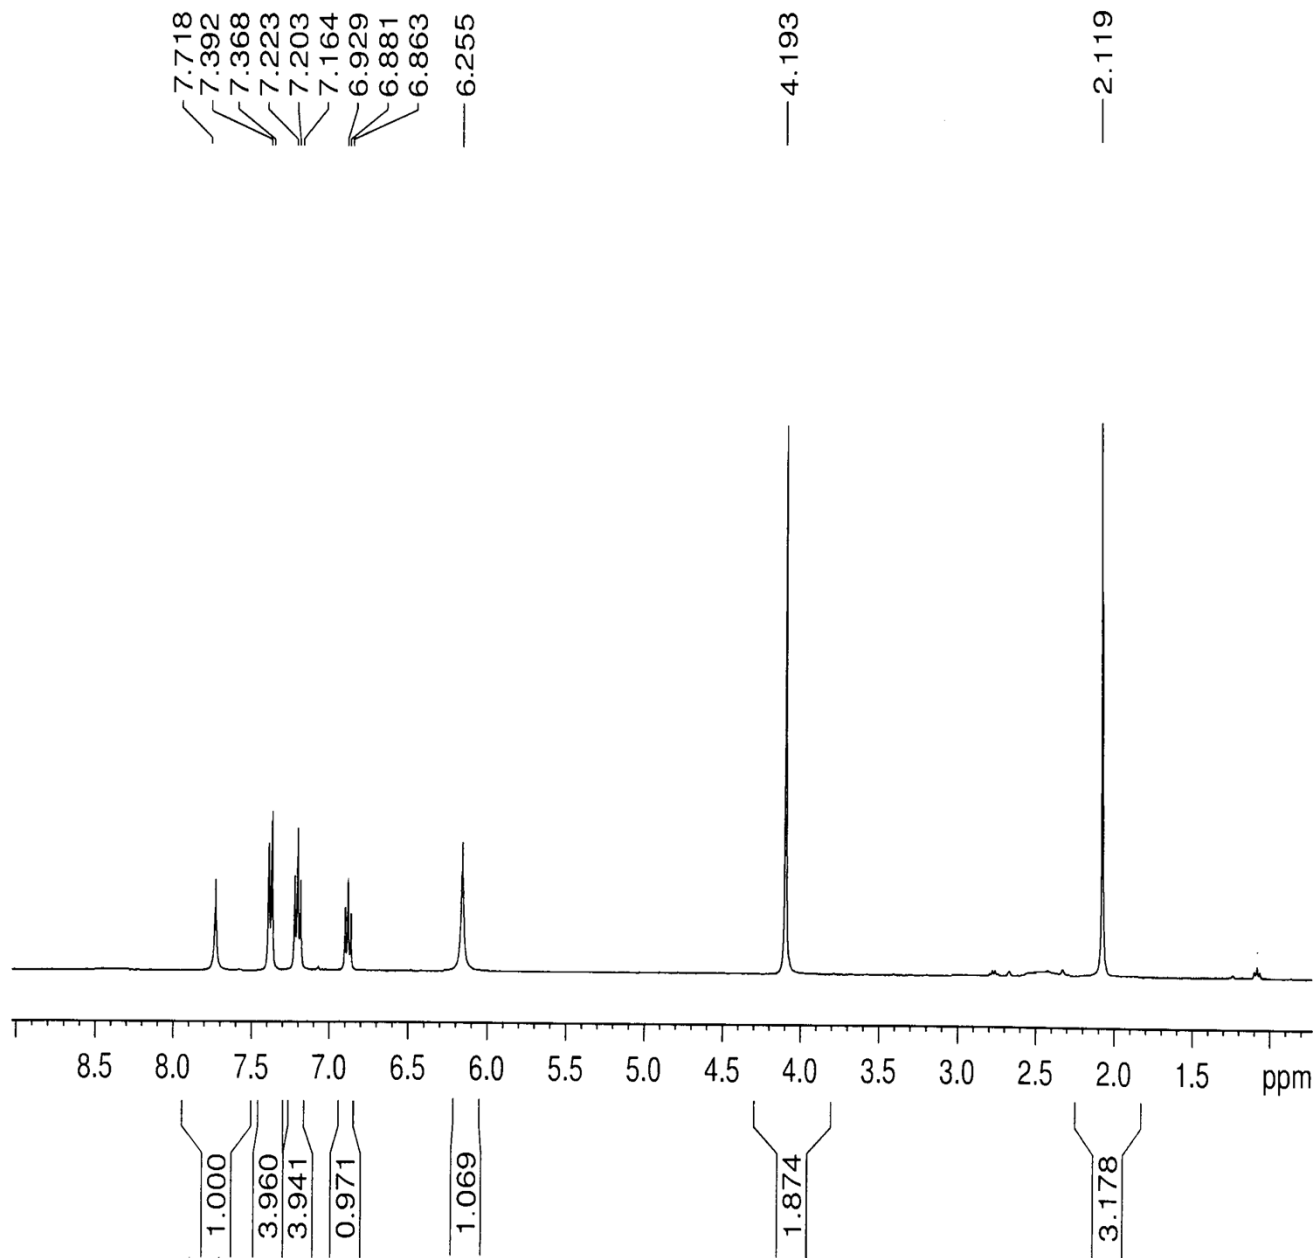

Compound 3j.  $^{13}\text{C}$  NMR Spectrum (DMSO- $d_6$ ).

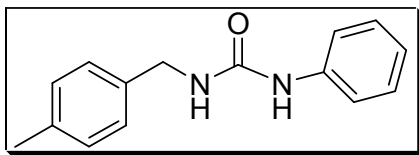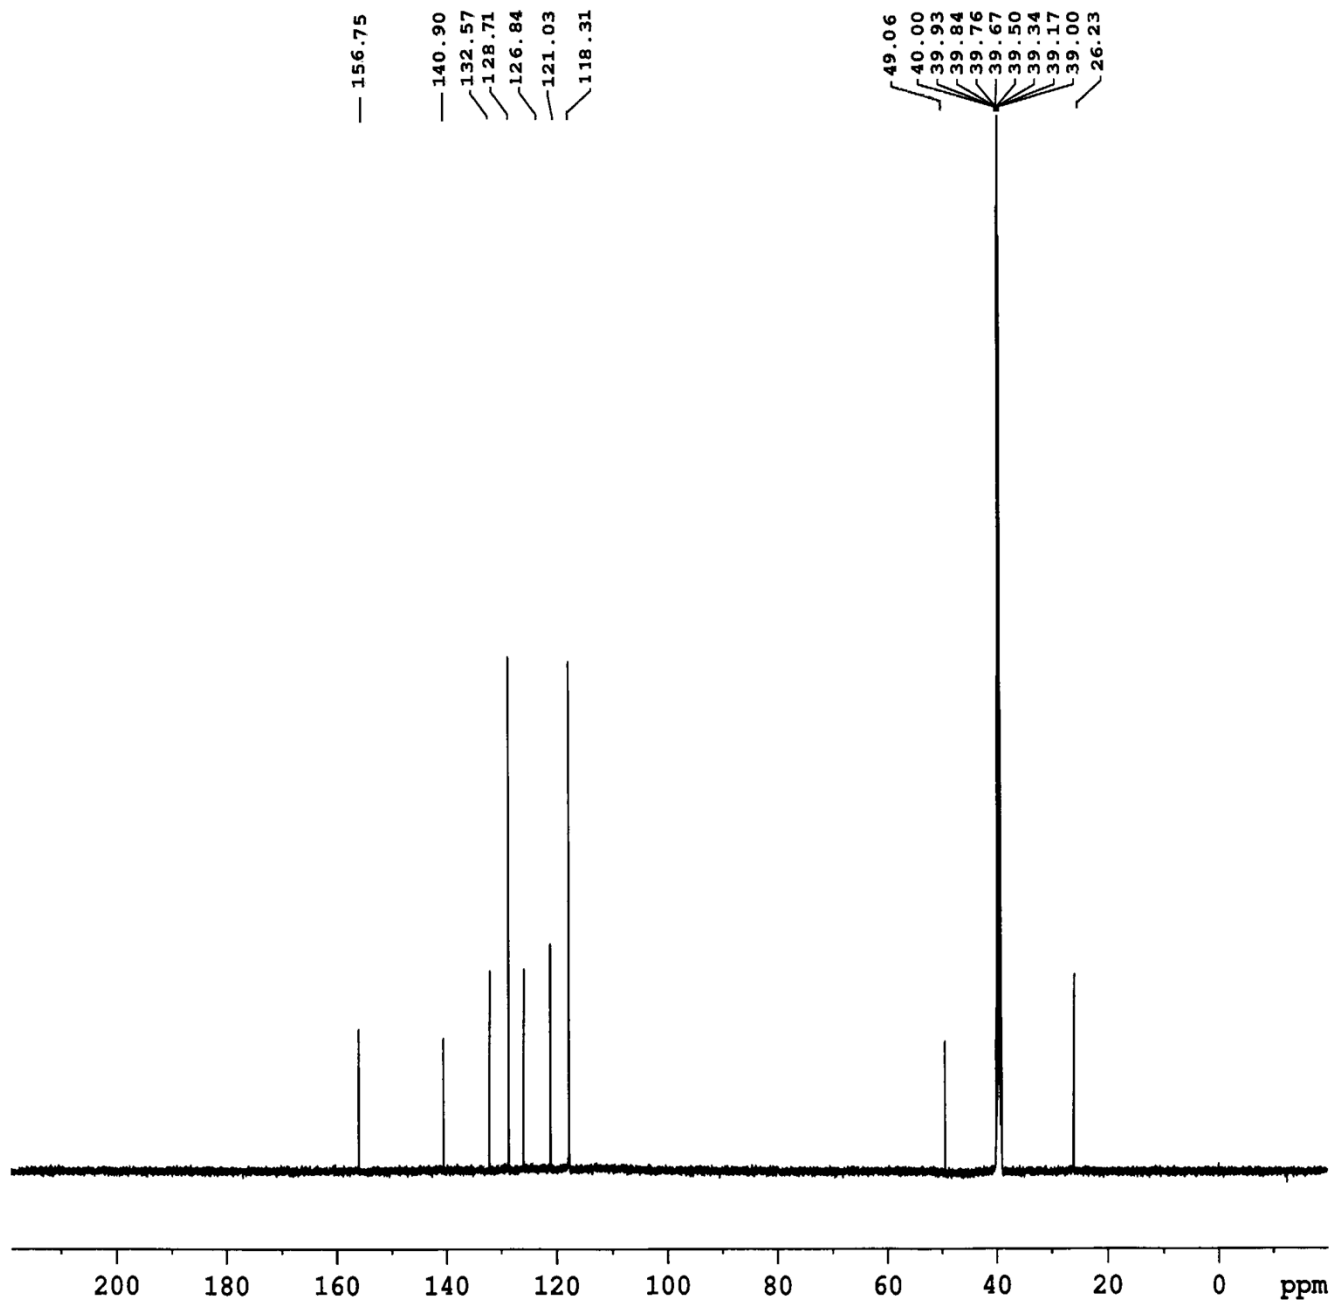

Compound 3k.  $^1\text{H}$  NMR Spectrum (DMSO- $d_6$ ).

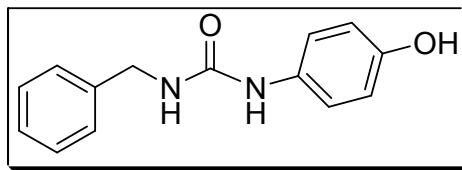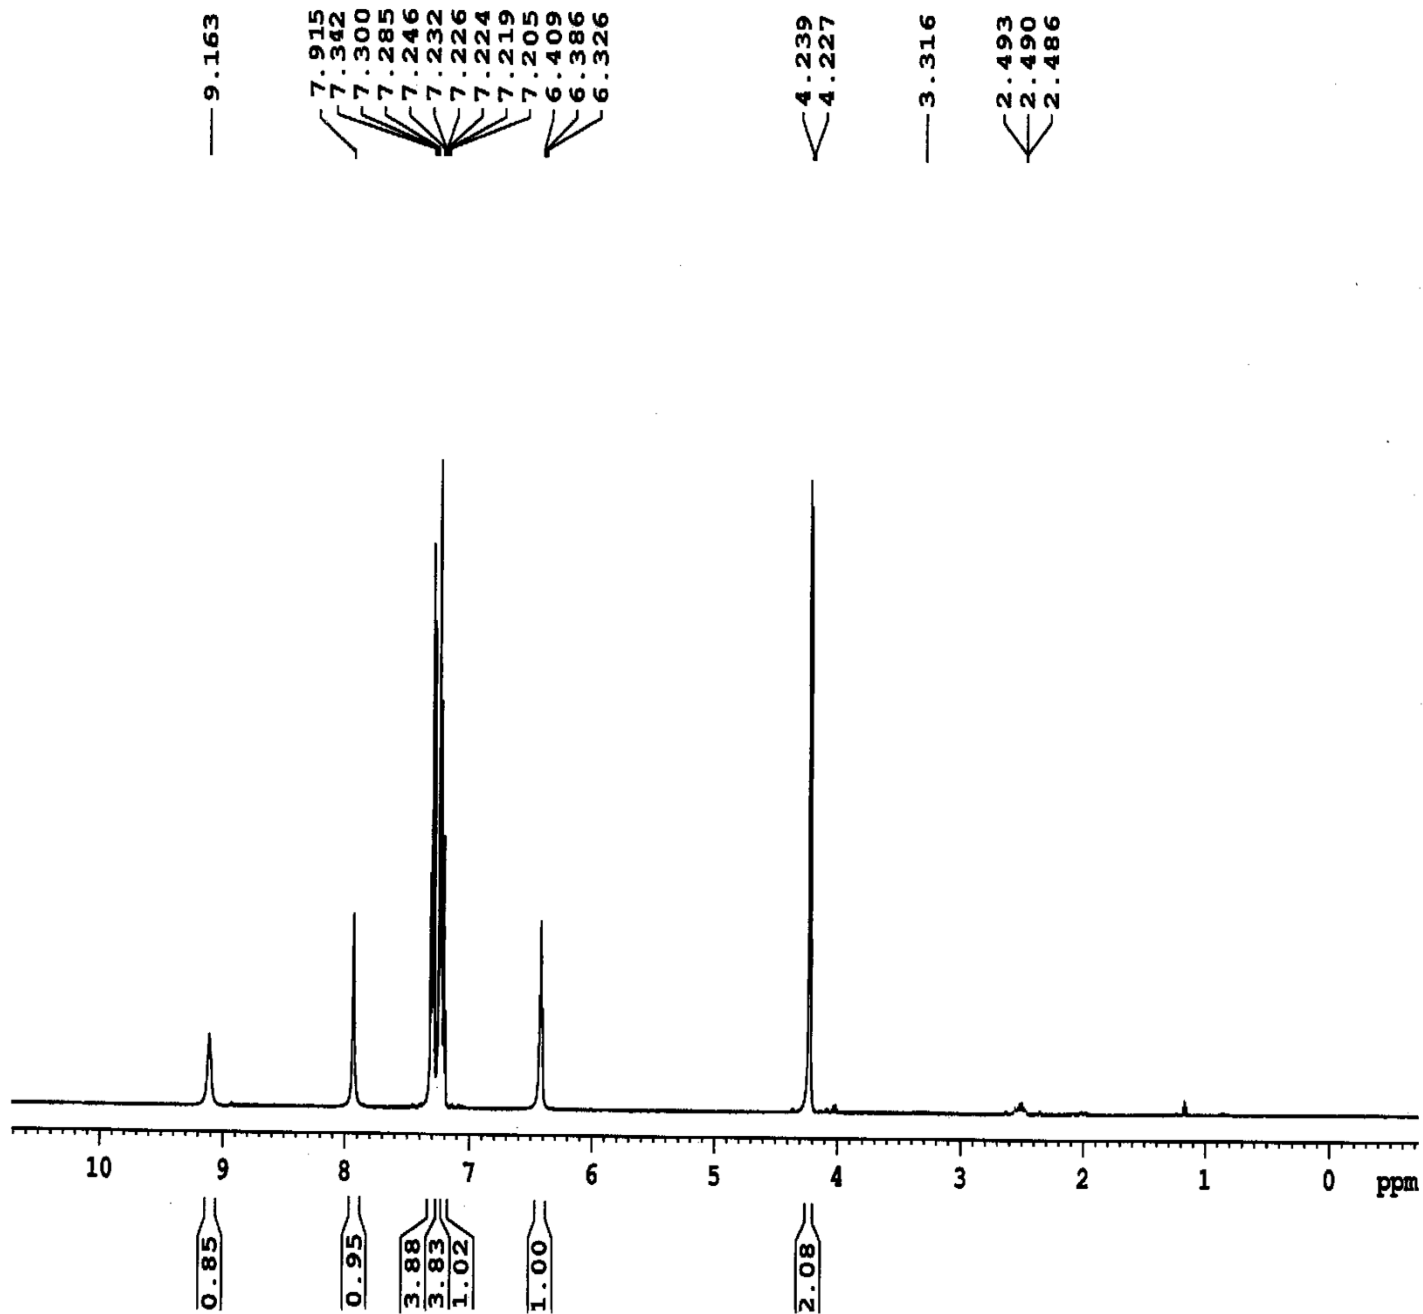

Compound 3k.  $^{13}\text{C}$  NMR Spectrum (DMSO- $d_6$ ).

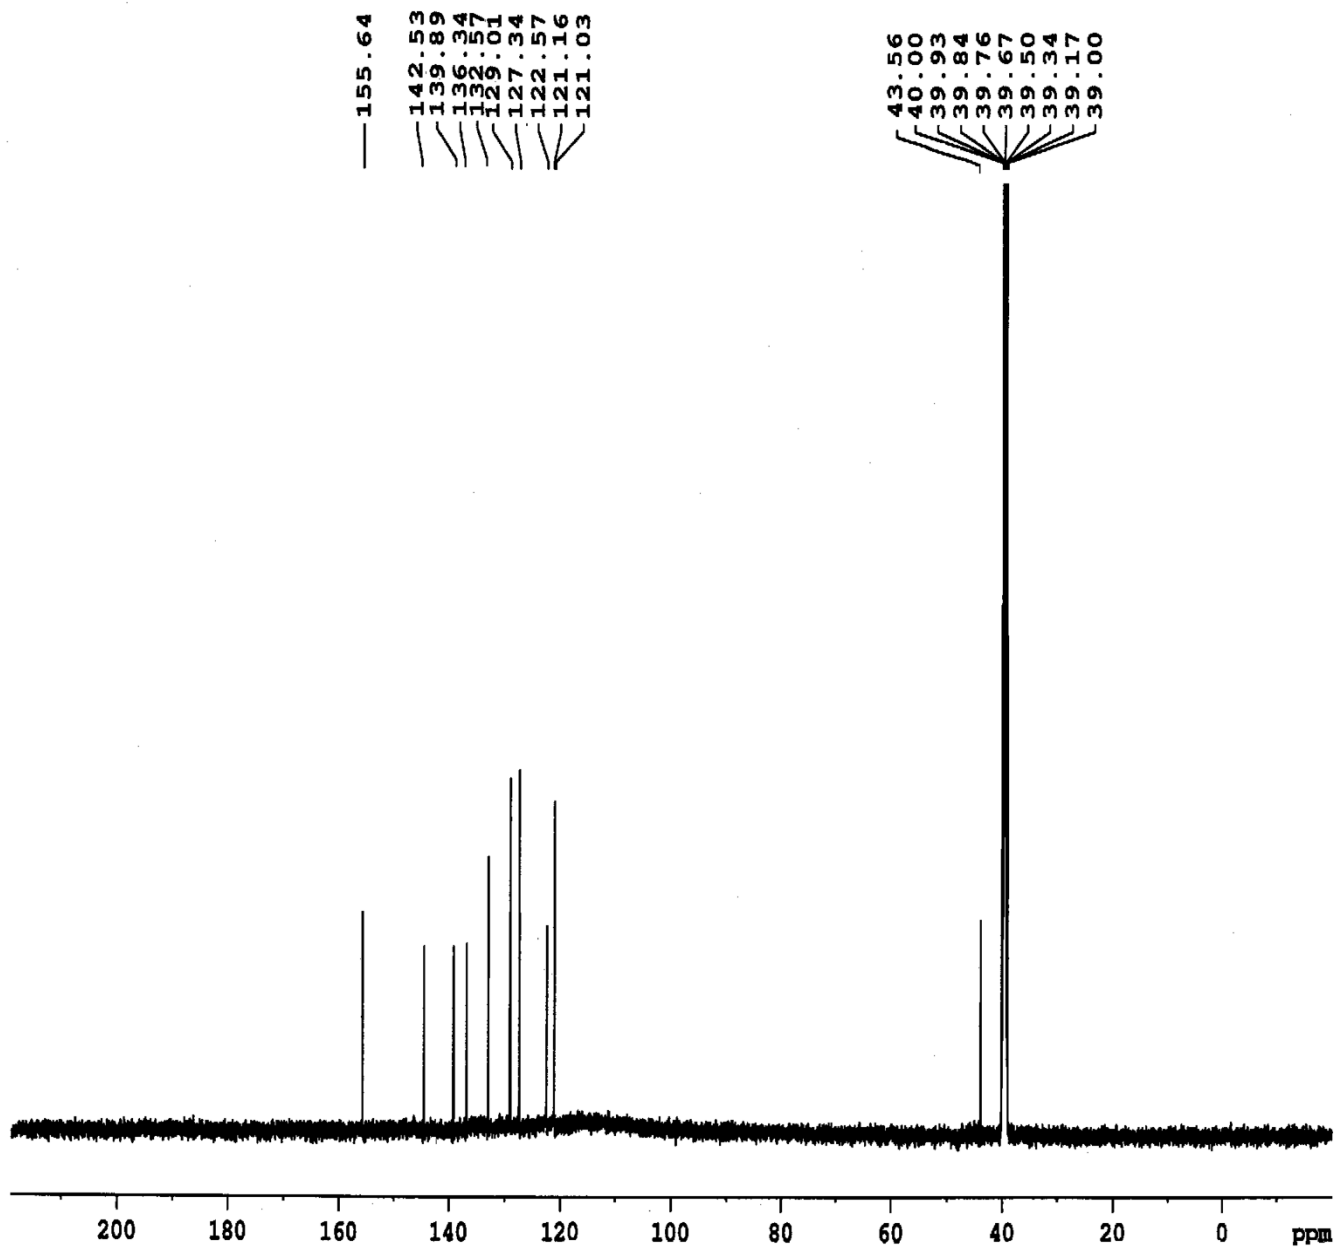

Compound 3l. <sup>1</sup>H NMR Spectrum (CDCl<sub>3</sub>).

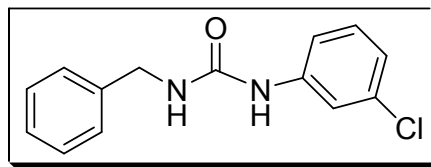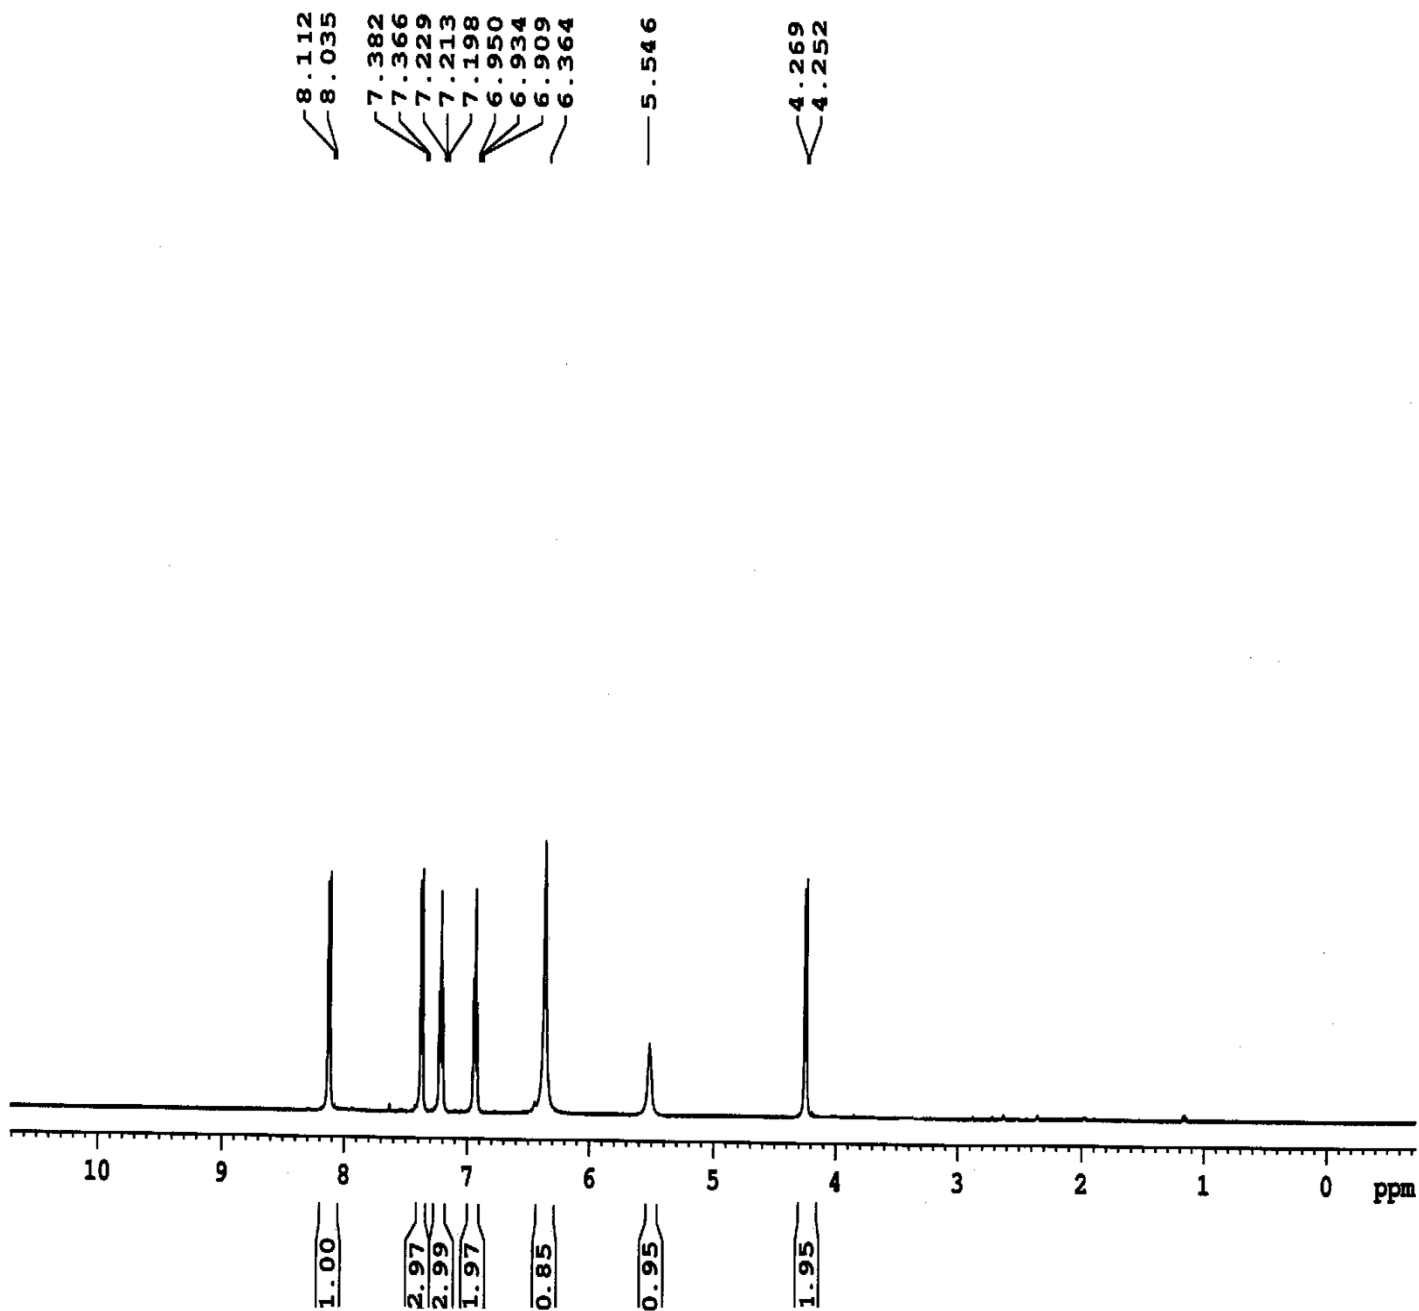



Compound 31.  $^{13}\text{C}$  NMR Spectrum (DMSO- $d_6$ ).

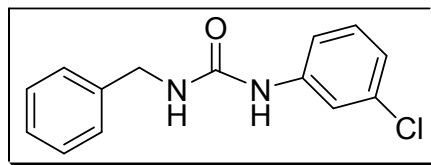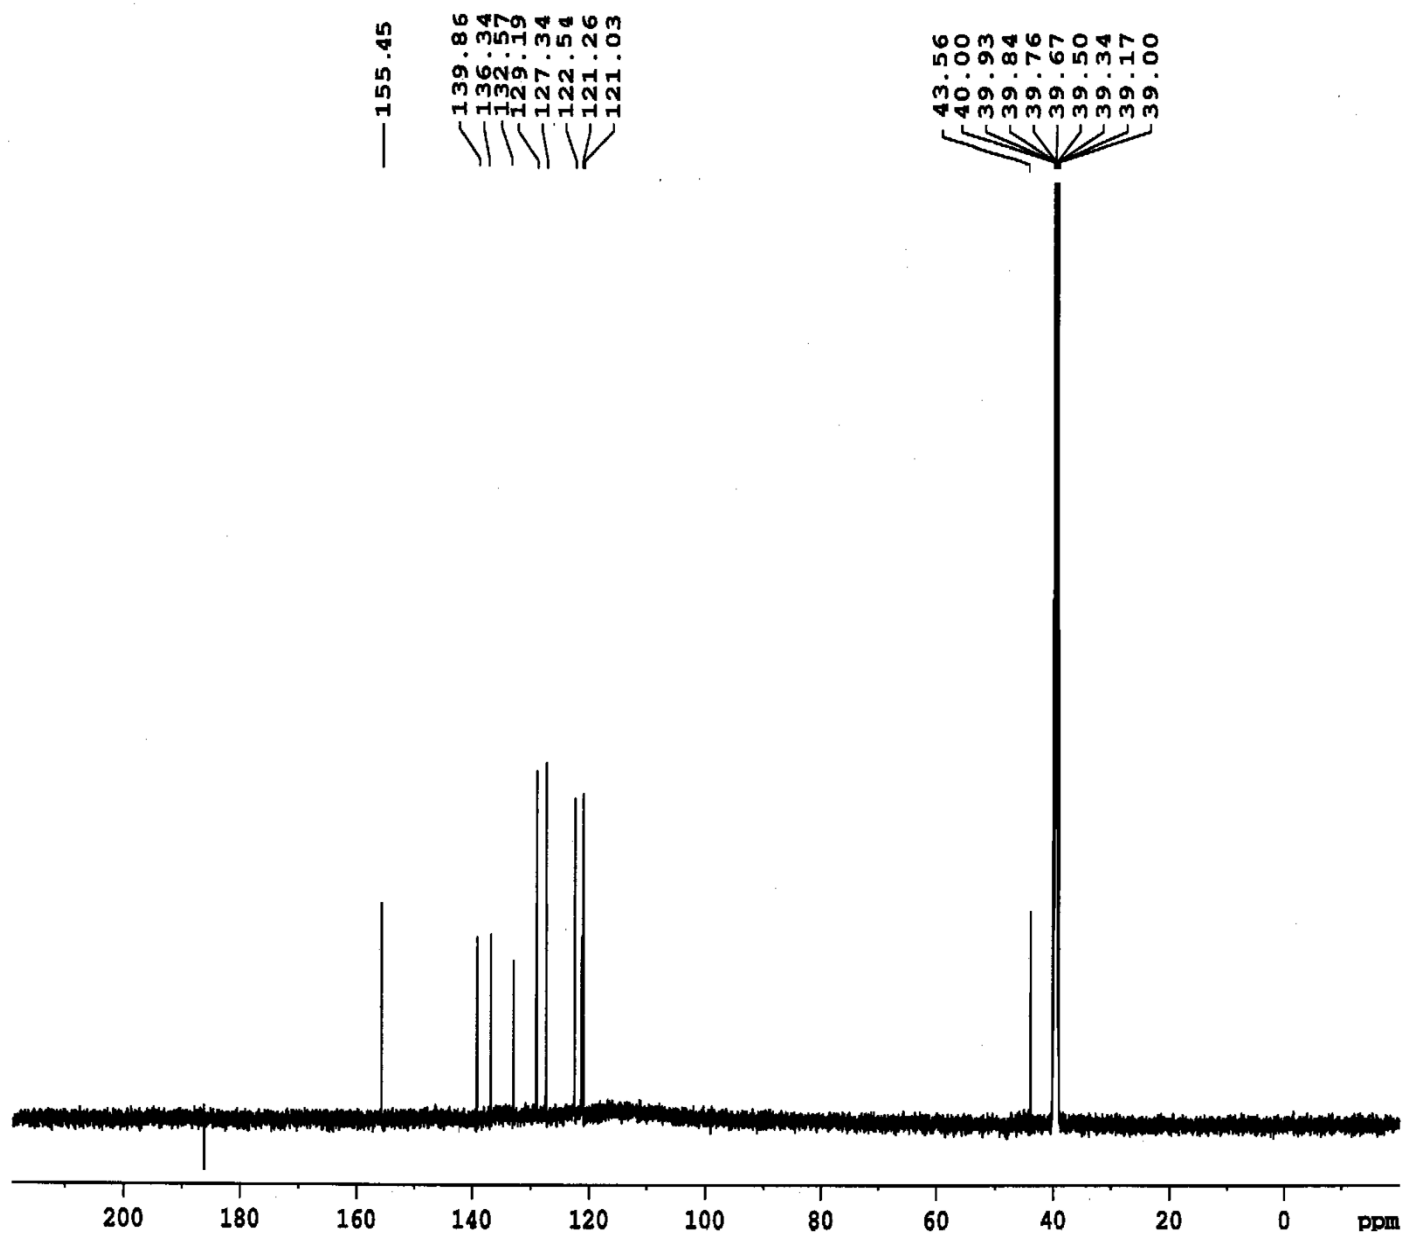

Compound 3m.  $^1\text{H}$  NMR Spectrum ( $\text{CDCl}_3$ ).

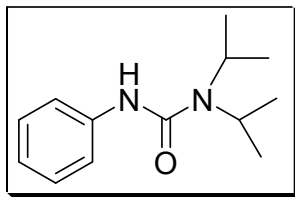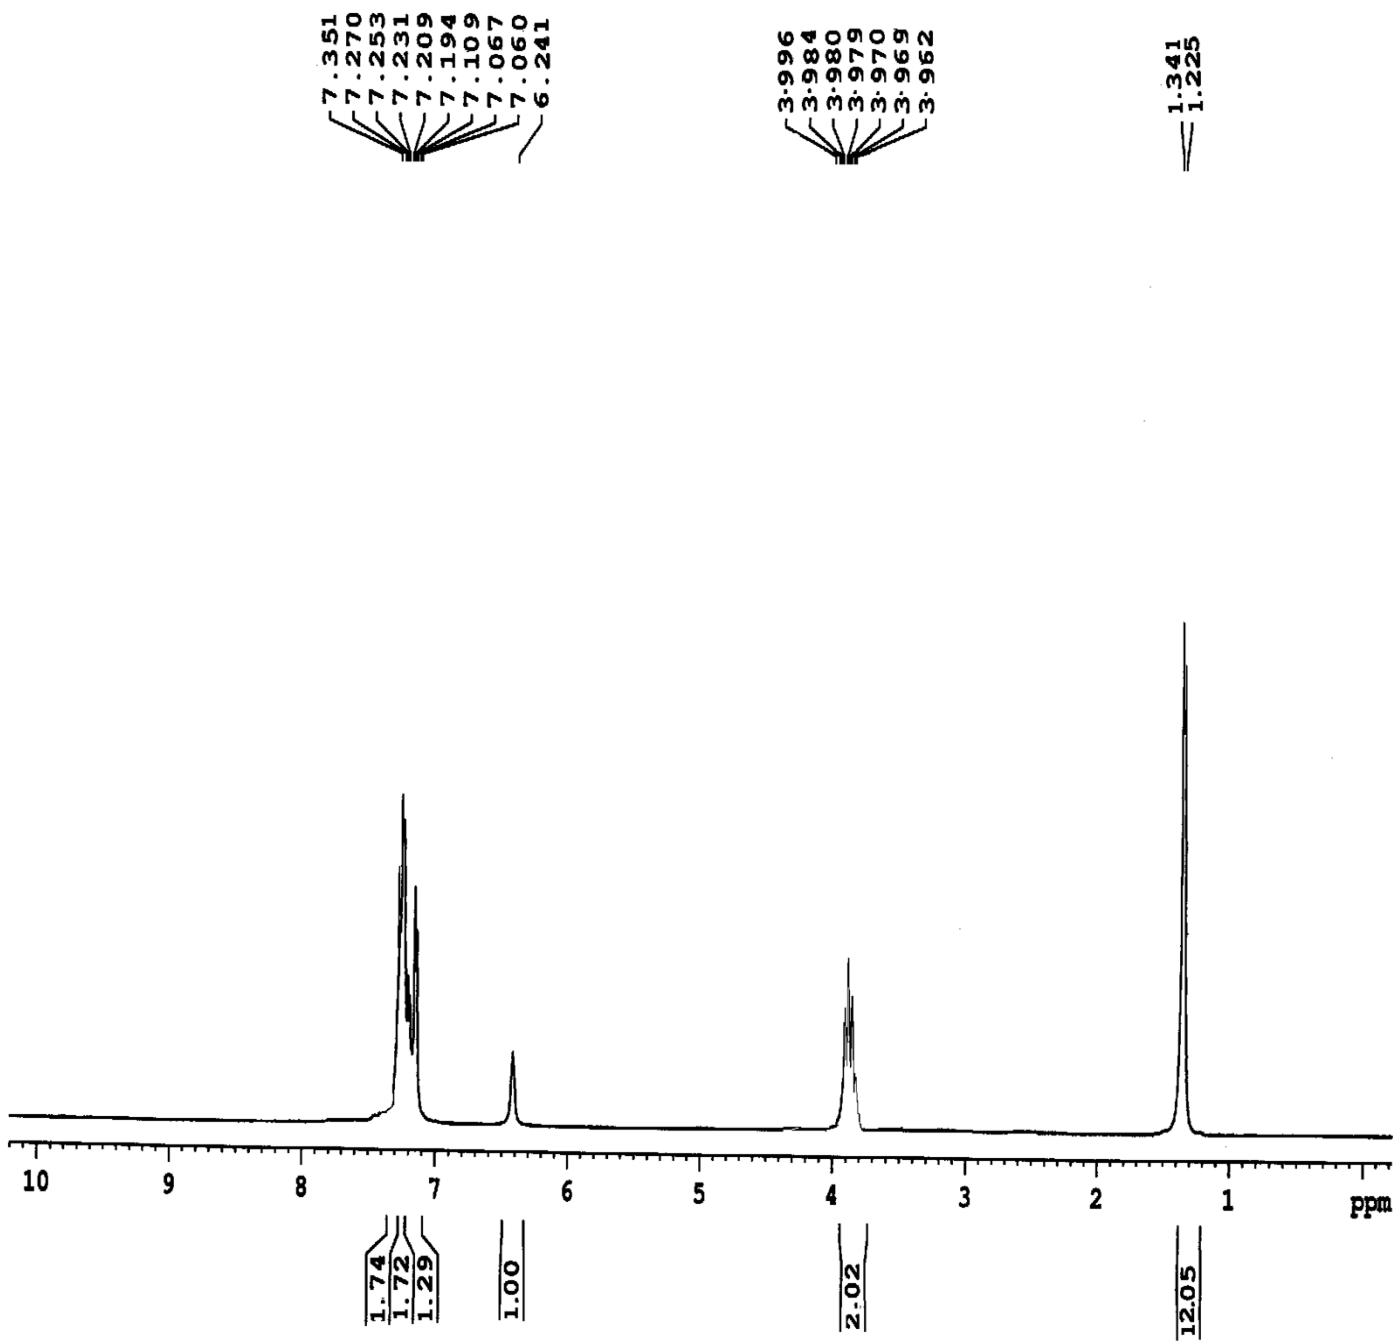

Compound 3m.  $^{13}\text{C}$  NMR Spectrum ( $\text{CDCl}_3$ ).

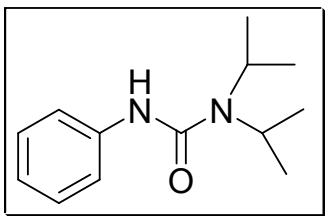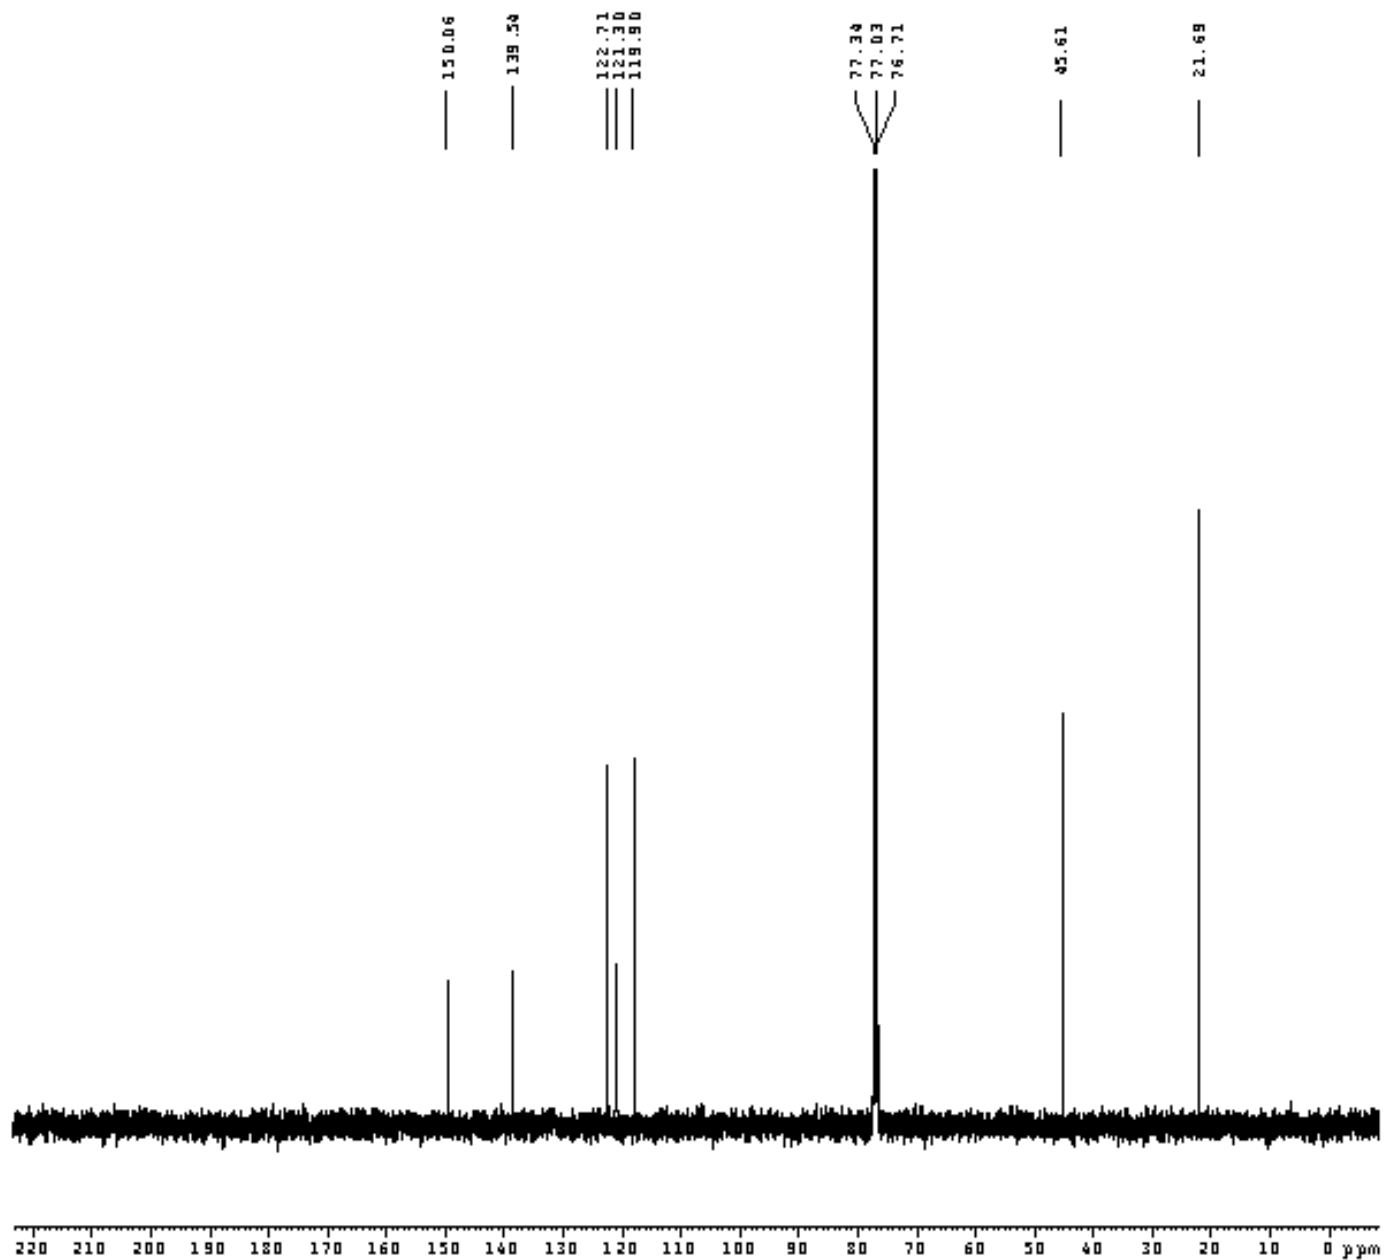

Compound 3n.  $^1\text{H}$  NMR Spectrum ( $\text{CDCl}_3$ ).

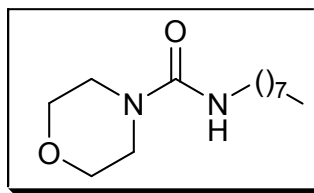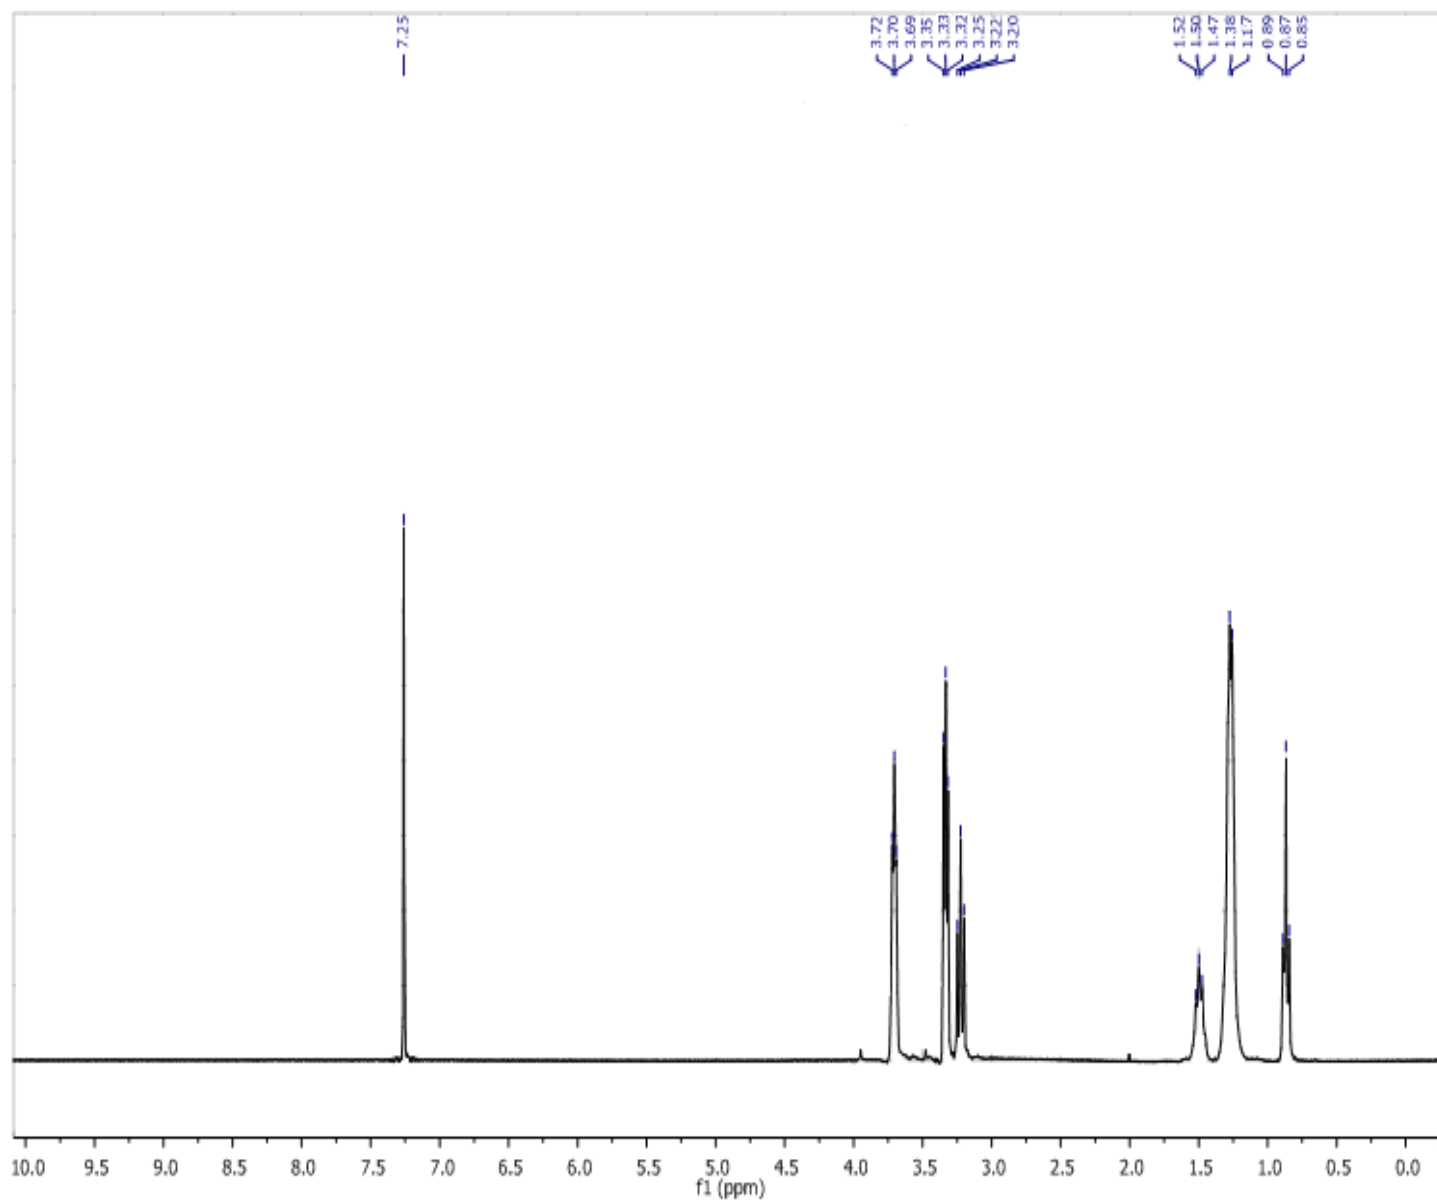

**Compound 3n.**  $^{13}\text{C}$  NMR Spectrum ( $\text{CDCl}_3$ ).

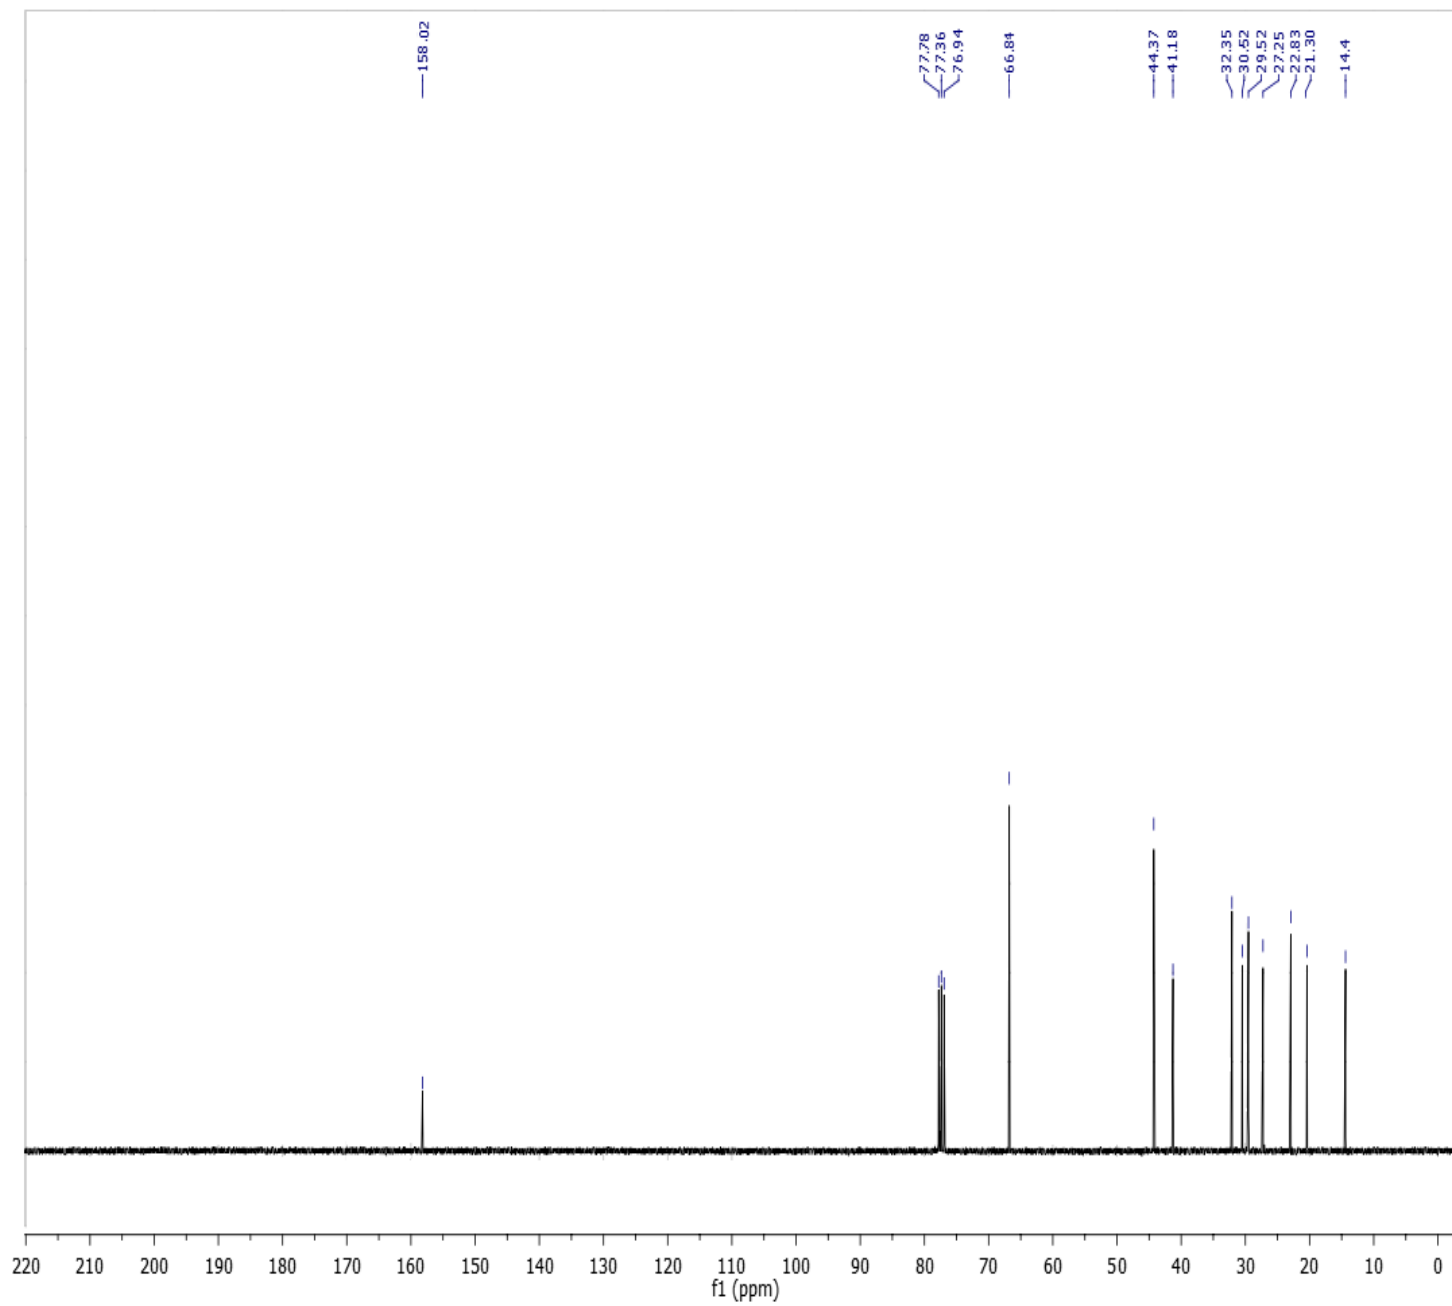

Compound 30.  $^1\text{H}$  NMR Spectrum (DMSO- $d_6$ ).

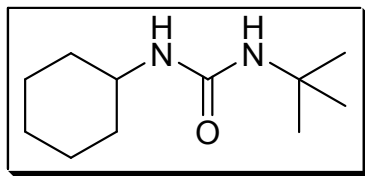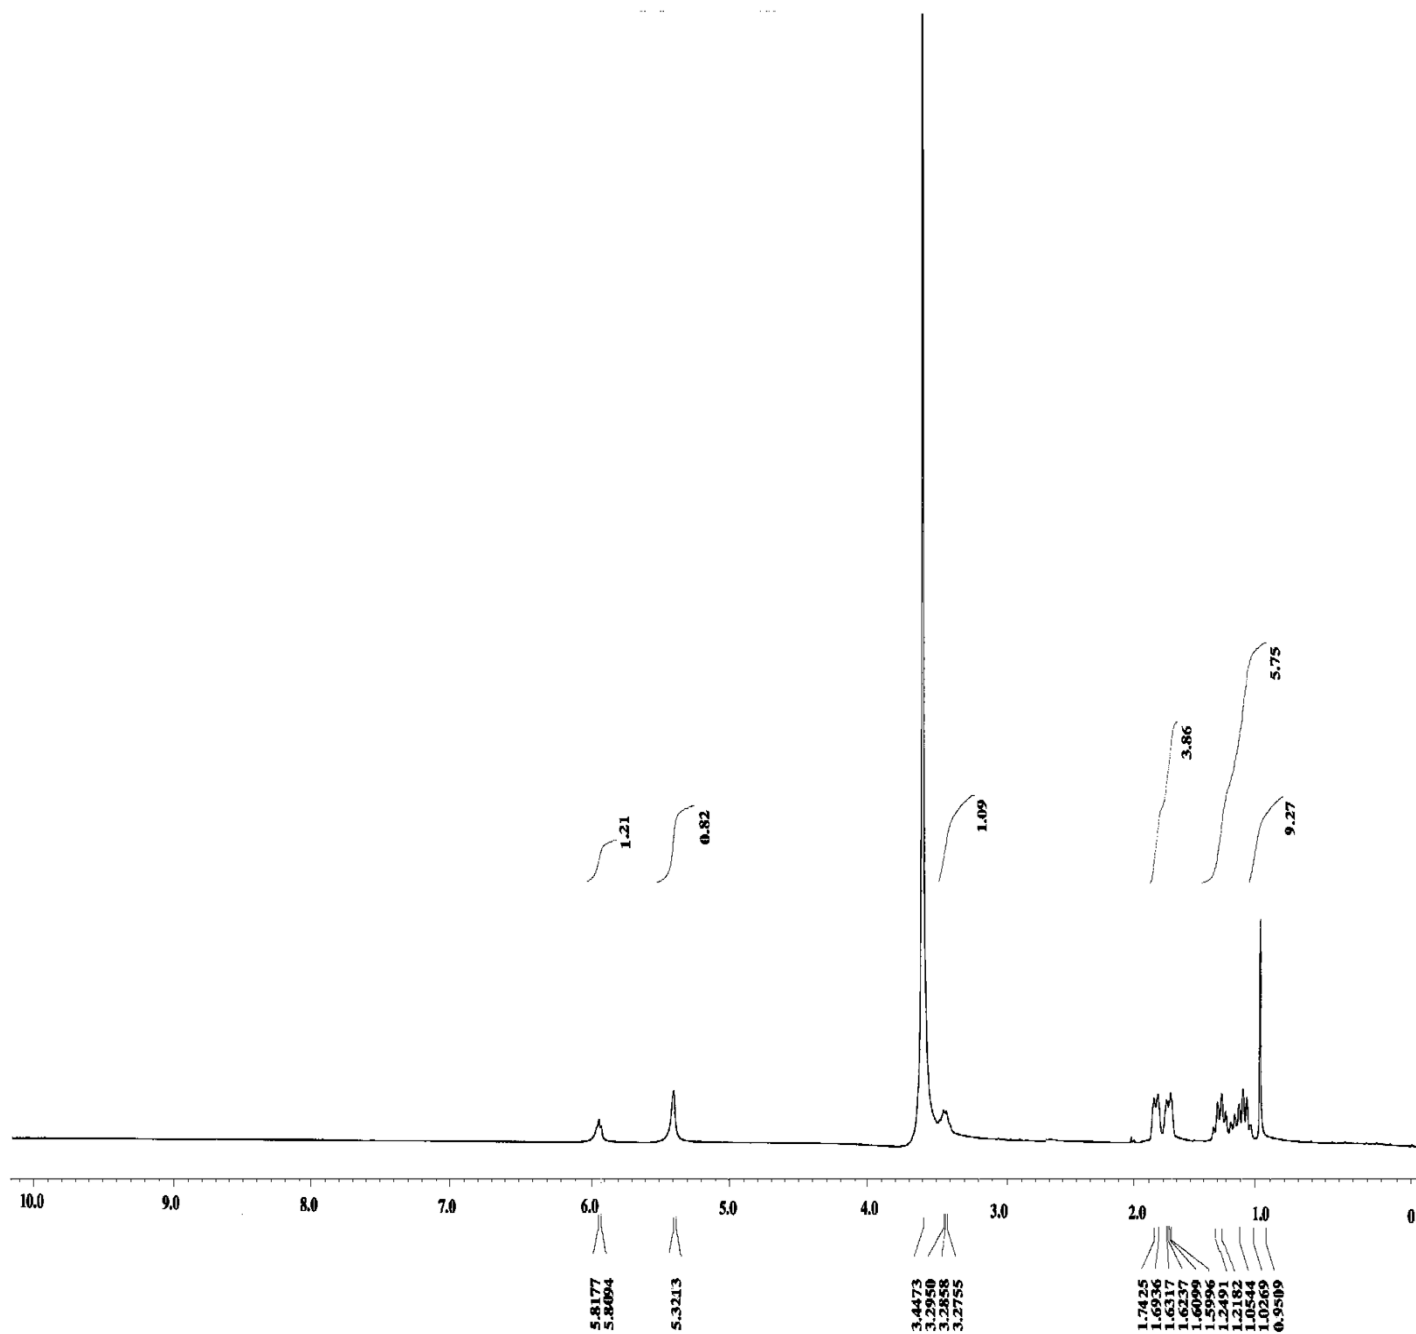

**Compound 3o.**  $^{13}\text{C}$  NMR Spectrum (DMSO- $d_6$ ).

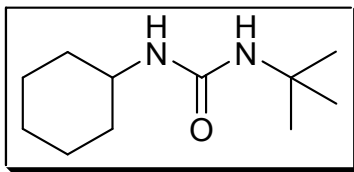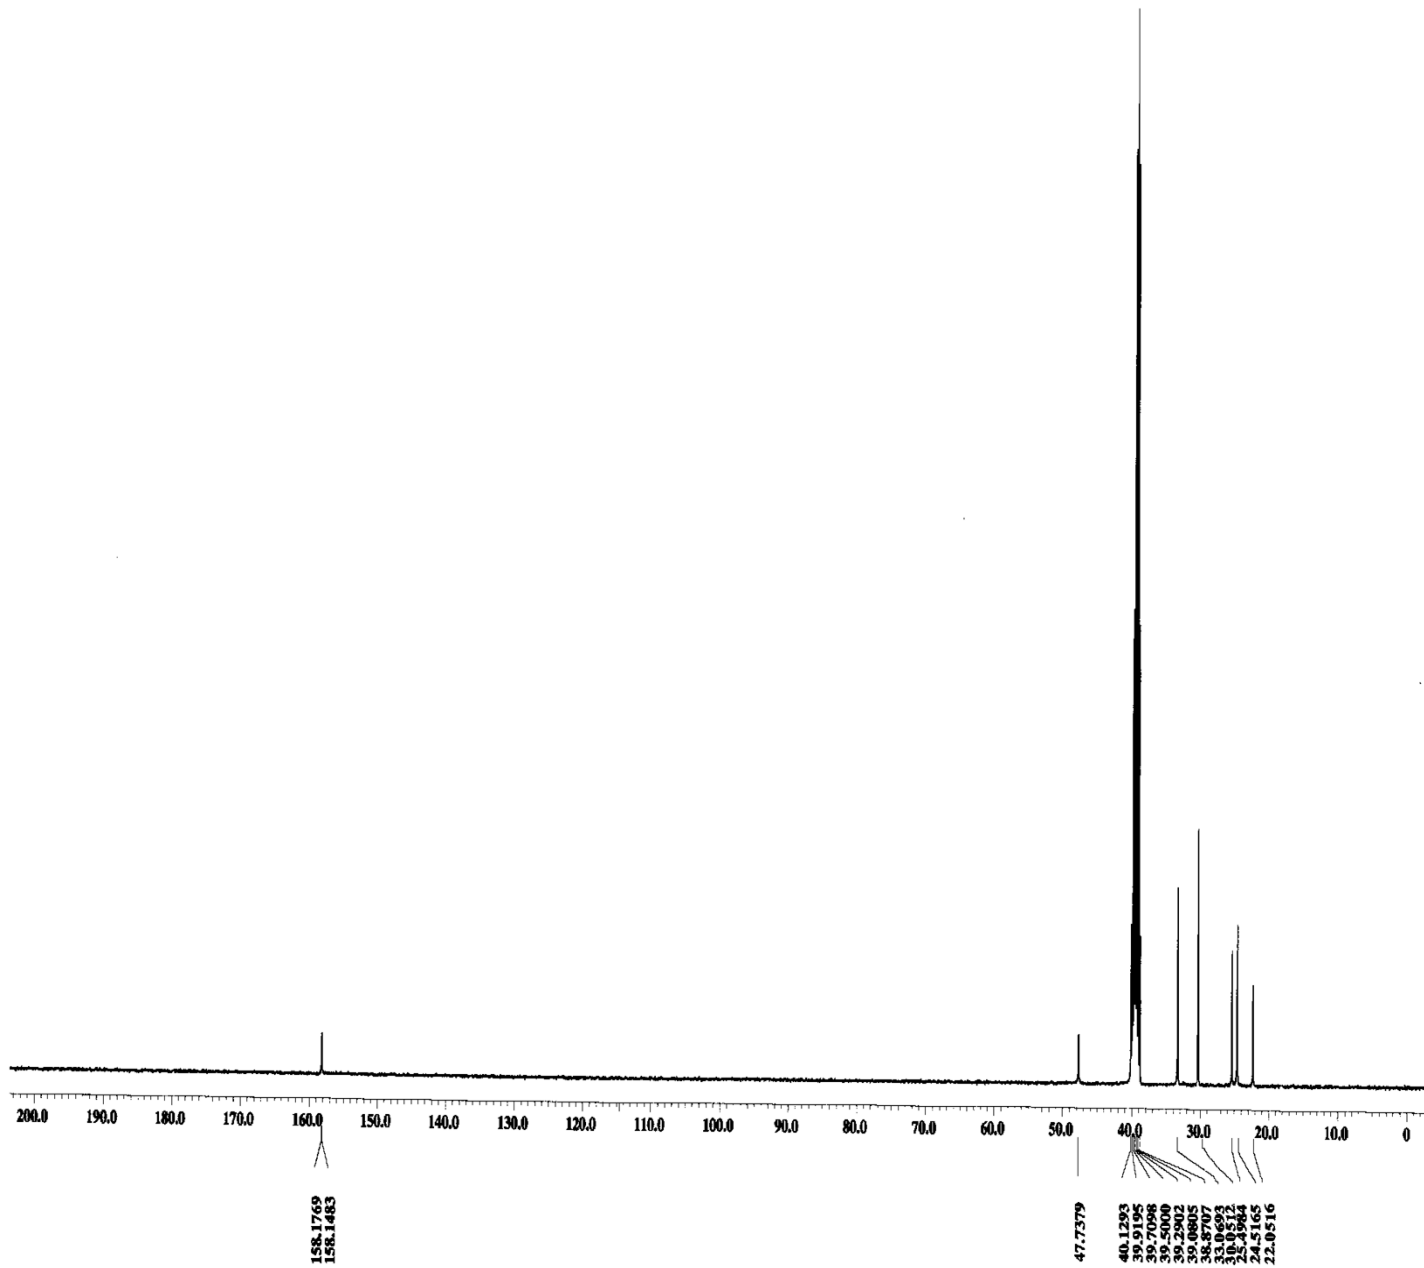

Supplement: c4ra03805c1.pdf [file c4ra03805c1.pdf]
